# Supplementary material
Source: publisher figshare collection journal article supplement (https://plos.figshare.com/articles/dataset/_/6792587)
Supplement: Supplementary file [file 1]

SUPPLEMENTARY FILE2. Table 2.1 Articles retained for the review

| Ref                                                                                                                                                                                                                               | Author(s)             | Country<br>(further specifications, if any)      | Study period<br>(year)            | Study design<br>§ | Unit of analysis<br>§§ | Short study description                                                      | Study population     |                                                                 |                 |                 | Outcome                      |               |                                                        | Confounders<br>(N or list all, if any) | Social and/or demographic factors |                                                                      | Leprosy cases                                                      |                             |                                                                                              | Comparison group<br>†††                           |                                              | Statistical analysis |                                   | Unadjusted association measure<br>(95% CI or P-value)                                                                                              | Adjusted association measure<br>(95% CI or P-value) |
|-----------------------------------------------------------------------------------------------------------------------------------------------------------------------------------------------------------------------------------|-----------------------|--------------------------------------------------|-----------------------------------|-------------------|------------------------|------------------------------------------------------------------------------|----------------------|-----------------------------------------------------------------|-----------------|-----------------|------------------------------|---------------|--------------------------------------------------------|----------------------------------------|-----------------------------------|----------------------------------------------------------------------|--------------------------------------------------------------------|-----------------------------|----------------------------------------------------------------------------------------------|---------------------------------------------------|----------------------------------------------|----------------------|-----------------------------------|----------------------------------------------------------------------------------------------------------------------------------------------------|-----------------------------------------------------|
|                                                                                                                                                                                                                                   |                       |                                                  |                                   |                   |                        |                                                                              | Type of study<br>§§§ | Total size                                                      | Age             | Study area<br>† | Leprosy cases<br>(No.)       | Measure<br>†† | Prevalence/<br>Incidence in the studied area           |                                        | Factors studied                   | Categories                                                           | No. or mean                                                        | % or SD                     | Incidence or Prevalence<br>(by category)                                                     | No. or mean                                       | % or SD                                      | Method #             | Type of association measure<br>## |                                                                                                                                                    |                                                     |
| (14)                                                                                                                                                                                                                              | Doull JA et al, 1942  | Philippines (Talisay and Cordova municipalities) | 1936-37 (Talisay), 1933 (Cordova) | CH                | Individual             | Retrospective study on contact status as a risk to develop leprosy.          | PB                   | 13,734 (217,729 PYR) in Talisay; 8,057 (117,287 PYR) in Cordova | <5 to 50+ years | NA              | 242 (Talisay), 160 (Cordova) | I             | 1.11 / 1,000 PYR (Talisay), 1.38 / 1,000 PYR (Cordova) | Sex                                    | Household contact                 | No<br><br>Yes<br><br>No (male)<br>(female)<br>Yes (male)<br>(female) | 252 (307,663 PYR)<br>150 (27,353 PYR)                              |                             | 0.82 / 1,000<br>5.48 / 1,000<br>1.11 / 1,000<br>0.55 / 1,000<br>6.69 / 1,000<br>3.87 / 1,000 |                                                   |                                              | Contingency table    | RR‡                               | 6.70‡ (5.43, 8.23)                                                                                                                                 |                                                     |
| Incidence rate was over six times higher in household contacts (person who had lived under the same roof as a case for at least 1 month) than in non-contacts, and higher in males than females both in contacts and non-contacts |                       |                                                  |                                   |                   |                        |                                                                              |                      |                                                                 |                 |                 |                              |               |                                                        |                                        |                                   |                                                                      |                                                                    |                             |                                                                                              |                                                   |                                              |                      |                                   |                                                                                                                                                    |                                                     |
| (28)                                                                                                                                                                                                                              | Nigam P et al, 1977   | India (Bundelkhand area)                         | 1974-1975                         | CS                | Individual             | Cross-sectional study carried out on the total population of three villages. | PB                   | 3,362                                                           | All ages        | RUR             | 18                           | P             | 5.35 / 1,000                                           | N                                      | Sex                               | M<br>F                                                               | 13<br>5                                                            |                             | 7.03/ 1,000<br>3.30/ 1,000                                                                   | 1,835<br>1,509                                    |                                              | Contingency table    | OR‡                               | 1.00<br>2.14 (0.71, 7.68)                                                                                                                          |                                                     |
| Risk of leprosy was higher, although non significantly, in males, and in poorer people                                                                                                                                            |                       |                                                  |                                   |                   |                        |                                                                              |                      |                                                                 |                 |                 |                              |               |                                                        |                                        |                                   |                                                                      |                                                                    |                             |                                                                                              |                                                   |                                              |                      |                                   |                                                                                                                                                    |                                                     |
| (29)                                                                                                                                                                                                                              | Bhavsar BS et al,1980 | India (Surat District)                           | 1976-1978                         | CS                | Individual             | School survey.                                                               | PB                   | 21,412                                                          | 5-19 years      | MX              | 26                           | P             | 12/10,000                                              | N                                      | Age                               | 5 to 9 years<br>10 to 14 years<br>15 to 19 years                     | 12<br>11<br>3                                                      |                             | 14/10,000<br>9/10,000<br>81/10,000                                                           | 8,102<br>11,665<br>1,645                          |                                              | Contingency table    | Chi square                        | 1.54 ( <i>p</i> >0.05)<br><br>7.53*( <i>p</i> <0.01)<br><br>17.63*( <i>p</i> <0.001)<br><br>8.11*( <i>p</i> <0.05)<br><br>26.02*( <i>p</i> <0.001) |                                                     |
|                                                                                                                                                                                                                                   |                       |                                                  |                                   |                   |                        |                                                                              |                      |                                                                 |                 |                 |                              |               |                                                        |                                        |                                   | Sex                                                                  | Male<br>Female                                                     | 22<br>4                     |                                                                                              | 17/10,000<br>4/10,000                             | 12,453<br>8,959                              |                      |                                   |                                                                                                                                                    |                                                     |
|                                                                                                                                                                                                                                   |                       |                                                  |                                   |                   |                        |                                                                              |                      |                                                                 |                 |                 |                              |               |                                                        |                                        |                                   | Type of area                                                         | Urban<br>Rural                                                     | 9<br>17                     |                                                                                              | 6/10,000<br>28/10,000                             | 15,350<br>6,062                              |                      |                                   |                                                                                                                                                    |                                                     |
|                                                                                                                                                                                                                                   |                       |                                                  |                                   |                   |                        |                                                                              |                      |                                                                 |                 |                 |                              |               |                                                        |                                        |                                   | Social-economic groups                                               | Class I<br>Class II<br>Class III<br>Class IV<br>Class V<br>missing | 0<br>0<br>7<br>16<br>3<br>0 |                                                                                              | 0<br>0<br>8/10,000<br>19/10,000<br>46/10,000<br>0 | 450<br>1,766<br>9,419<br>8,595<br>650<br>532 |                      |                                   |                                                                                                                                                    |                                                     |
|                                                                                                                                                                                                                                   |                       |                                                  |                                   |                   |                        |                                                                              |                      |                                                                 |                 |                 |                              |               |                                                        |                                        |                                   | Score of socio-sanitary conditions of household                      | 6 (best condition)<br>5<br>4<br>3<br>2                             | 0<br>1<br>1<br>2<br>2       |                                                                                              | 0<br>3/10,000<br>7/10,000<br>6/10,000<br>6/10,000 | 647<br>3,240<br>1,340<br>3,331<br>3,084      |                      |                                   |                                                                                                                                                    |                                                     |

<sup>1</sup> test of homogeneity (equal odds): chi square (*p*-value)

<sup>2</sup> score test for trend of odds: chi square (*p*-value)

|                                                                                                                                                                                                                                                                                                                                                   |                           |                              |                                                                                                                                  |         |                                |                                                                                                                                                                                                                                                                                                                                                                                |    |                                |          |     |       |   |                                                                    |   |                                                                                                                                                                                                                                      |                                                                                                                                              |                                                                          |                                                                                             |                                                                                                                                                              |                                                                                                    |                                                                                      |                                              |                                               |                                                                                                                                                                                                                                                                                 |  |  |
|---------------------------------------------------------------------------------------------------------------------------------------------------------------------------------------------------------------------------------------------------------------------------------------------------------------------------------------------------|---------------------------|------------------------------|----------------------------------------------------------------------------------------------------------------------------------|---------|--------------------------------|--------------------------------------------------------------------------------------------------------------------------------------------------------------------------------------------------------------------------------------------------------------------------------------------------------------------------------------------------------------------------------|----|--------------------------------|----------|-----|-------|---|--------------------------------------------------------------------|---|--------------------------------------------------------------------------------------------------------------------------------------------------------------------------------------------------------------------------------------|----------------------------------------------------------------------------------------------------------------------------------------------|--------------------------------------------------------------------------|---------------------------------------------------------------------------------------------|--------------------------------------------------------------------------------------------------------------------------------------------------------------|----------------------------------------------------------------------------------------------------|--------------------------------------------------------------------------------------|----------------------------------------------|-----------------------------------------------|---------------------------------------------------------------------------------------------------------------------------------------------------------------------------------------------------------------------------------------------------------------------------------|--|--|
|                                                                                                                                                                                                                                                                                                                                                   |                           |                              |                                                                                                                                  |         |                                |                                                                                                                                                                                                                                                                                                                                                                                |    |                                |          |     |       |   |                                                                    |   |                                                                                                                                                                                                                                      | 1<br>0<br>missing                                                                                                                            | 7<br>13<br>0                                                             |                                                                                             | 12/10,000<br>37/10,000<br>0                                                                                                                                  | 5,678<br>3,432<br>660                                                                              |                                                                                      |                                              |                                               |                                                                                                                                                                                                                                                                                 |  |  |
| Prevalence of leprosy was lower than in other areas in India, but increased with deterioration of socioeconomic and home sanitary conditions.                                                                                                                                                                                                     |                           |                              |                                                                                                                                  |         |                                |                                                                                                                                                                                                                                                                                                                                                                                |    |                                |          |     |       |   |                                                                    |   |                                                                                                                                                                                                                                      |                                                                                                                                              |                                                                          |                                                                                             |                                                                                                                                                              |                                                                                                    |                                                                                      |                                              |                                               |                                                                                                                                                                                                                                                                                 |  |  |
| (15)                                                                                                                                                                                                                                                                                                                                              | Dominguez VM et al, 1980  | Myanmar (Singu municipality) | 1964-76: 1 <sup>st</sup> survey in 1964-68, 2 <sup>nd</sup> survey in 1969-72, annual follow-up of cases and contacts in 1965-76 | CH      | Individual                     | Estimation of incidence rates of leprosy in the 2 <sup>nd</sup> mass survey among the individuals free of leprosy during the 1 <sup>st</sup> survey (mean period four years) in 163 villages.                                                                                                                                                                                  | PB | 52,026                         | All ages | NA  | 1,367 | I | 9.8/1,000 PYR (among contacts); 5.9/1,000 PYR (among non-contacts) | N | Household contact                                                                                                                                                                                                                    | No<br>Yes                                                                                                                                    | 1,090<br>277                                                             | 2.3%<br>5.1%                                                                                | 5.9‰ / year<br>12.6‰ / year                                                                                                                                  | 45,446<br>5,203                                                                                    | 97.7%<br>94.9%                                                                       | Contingency table                            | RR‡                                           | 2.15 (1.89, 2.46)                                                                                                                                                                                                                                                               |  |  |
| The mean yearly incidence rate in household contacts was over twice than in non-contacts                                                                                                                                                                                                                                                          |                           |                              |                                                                                                                                  |         |                                |                                                                                                                                                                                                                                                                                                                                                                                |    |                                |          |     |       |   |                                                                    |   |                                                                                                                                                                                                                                      |                                                                                                                                              |                                                                          |                                                                                             |                                                                                                                                                              |                                                                                                    |                                                                                      |                                              |                                               |                                                                                                                                                                                                                                                                                 |  |  |
| (30)                                                                                                                                                                                                                                                                                                                                              | Sommerfelt H et al, 1985  | India (North Arcot District) | 1978 and 1982                                                                                                                    | CS + EC | Individual (CS); clusters (EC) | Two house-to-house surveys: one (1978) to assess demographic data and child nutritional status in 35 villages, the other one (1982) to assess leprosy prevalence in the the same villages. Correlation coefficients were used to assess the relationship between socio-demographic factors and leprosy incidence /1,000 inhabitants, among villages aggregated in 12 clusters. | PB | 7,428 individuals; 12 clusters | All ages | RUR | 131   | P | 17.9/1,000                                                         | N | CS study:<br>Type of area<br><br>EC study:<br>Poverty (≤ 600 rupees)<br>% Illiteracy of all members of family<br>% Malnutrition in children 1-4 years old (mid-upper-arm circumference-MUAC)<br>% Malnutrition in general population | Village<br>Field area<br><br><br><br>MUAC<12.5 cm<br>MUAC<13.5 cm                                                                            | 97<br>34                                                                 |                                                                                             | 20.2/1000<br>12.9*/1000                                                                                                                                      | 4,702<br>2,602                                                                                     |                                                                                      | Contingency table<br><br>Pearson correlation | Chi square with Yates correction<br>R squared | NA ( <i>p</i> =0.03)<br><br>0.099 ( <i>p</i> =0.16)<br>0.025 ( <i>p</i> =0.31)<br><br>0.318 ( <i>p</i> =0.028)<br>0.410 ( <i>p</i> =0.012)<br><br>0.0055 ( <i>p</i> =0.35)                                                                                                      |  |  |
| In villages/field areas and aggregates, lower leprosy prevalence rates was correlated to field areas. Moreover, there was a significant correlation between the occurrence of malnutrition in children 1 to 4 years of age and the prevalence of leprosy. Neither the occurrence of poverty nor illiteracy were correlated to leprosy prevalence. |                           |                              |                                                                                                                                  |         |                                |                                                                                                                                                                                                                                                                                                                                                                                |    |                                |          |     |       |   |                                                                    |   |                                                                                                                                                                                                                                      |                                                                                                                                              |                                                                          |                                                                                             |                                                                                                                                                              |                                                                                                    |                                                                                      |                                              |                                               |                                                                                                                                                                                                                                                                                 |  |  |
| (31)                                                                                                                                                                                                                                                                                                                                              | Chaturvedi RM et al, 1988 | India (Bombay)               | 1979-1983                                                                                                                        | CS      | Individual                     | Data collected in Malwany suburb from different sources (mass house-to-house survey, school survey, household contact survey, clinical referral cases and self-reported cases) and analyzed all together.                                                                                                                                                                      | PB | 63,321                         | All ages | URB | 691   | P | 10.91/1,000 (overall)                                              | N | Religion<br><br><br><br>Type of dwelling <sup>3</sup><br><br>Income per capita<br><br>Monthly income (rupees)                                                                                                                        | Hindu<br>Muslim<br>Christians<br>others<br>Zopadapatti<br>Chawls<br>Individual tenements<br>0-50 rupees<br>51-100<br>101-250<br>>250<br>mean | 331<br>318<br>39<br>3<br>463<br>221<br>7<br>327<br>283<br>70<br>11<br>62 | 47.90<br>46.02<br>5.65<br>0.44<br>67.01<br>31.98<br>1.01<br>47.32<br>40.96<br>10.13<br>1.59 | 9,17/1,000<br>13,57/1,000<br>12,57/1,000<br>4,30/1,000<br>11,42/1,000<br>10,11/1,000<br>7,68/1,000<br>20,82/1,000<br>10,16/1,000<br>4,57/1,000<br>2,48/1,000 | 36093<br>23428<br>3102<br>698<br>40557<br>21852<br>912<br>15704<br>27861<br>15323<br>4433<br>99.05 | 57.00<br>37.0<br>4.9<br>1.1<br>64.05<br>34.51<br>1.34<br>24.8<br>44.0<br>24.2<br>7.0 | Difference in proportions                    | Z test                                        | NA* ( <i>p</i> <0.001)<br>NA* ( <i>p</i> <0.05)<br>NA ( <i>p</i> =NS)<br>NA ( <i>p</i> =NS)<br>NA* ( <i>p</i> <0.001)<br>NA ( <i>p</i> =NS)<br>NA ( <i>p</i> =NS) |  |  |
| Leprosy is more prevalent among low socioeconomic status and overcrowded families. Prevalence is higher among Muslims, possibly because of overcrowding.                                                                                                                                                                                          |                           |                              |                                                                                                                                  |         |                                |                                                                                                                                                                                                                                                                                                                                                                                |    |                                |          |     |       |   |                                                                    |   |                                                                                                                                                                                                                                      |                                                                                                                                              |                                                                          |                                                                                             |                                                                                                                                                              |                                                                                                    |                                                                                      |                                              |                                               |                                                                                                                                                                                                                                                                                 |  |  |

<sup>3</sup> Chawls: public housing buildings constructed between 1920 and 1956 by factory owners and landowners to accommodate migrant workers in India, consisting of one-room apartments with a small cooking space and common toilet facilities on each floor; zopadpattis: informal neighbourhoods created through ad-hoc construction techniques, representing the type of slum in India most commonly depicted by media.

|      |                      |                           |           |    |            |                                                                                                                                            |    |     |          |     |    |   |    |   |                        |           |          |                |        |           |                |                   |    |                            |  |
|------|----------------------|---------------------------|-----------|----|------------|--------------------------------------------------------------------------------------------------------------------------------------------|----|-----|----------|-----|----|---|----|---|------------------------|-----------|----------|----------------|--------|-----------|----------------|-------------------|----|----------------------------|--|
| (21) | George K et al, 1990 | India (Asananbut village) | 1983-1984 | CC | Individual | Study on 72 cases from a SET <sup>4</sup> Unit and 216 matched controls from a Control Unit of the National Leprosy Eradication Programme. | HS | 288 | All ages | RUR | 72 | - | NA | N | Intrahousehold contact | No<br>Yes | 53<br>19 | 21.9%<br>41.3% | -<br>- | 189<br>27 | 78.1%<br>58.7% | Contingency table | OR | 1.00<br>2.51* (1.23, 5.11) |  |
|------|----------------------|---------------------------|-----------|----|------------|--------------------------------------------------------------------------------------------------------------------------------------------|----|-----|----------|-----|----|---|----|---|------------------------|-----------|----------|----------------|--------|-----------|----------------|-------------------|----|----------------------------|--|

|      |                         |                                   |                |    |          |                                                                                                                                                                                                                                                                                                                                                     |    |     |          |     |     |   |    |                                                                                                                                   |                                                    |                       |     |  |  |     |  |    |                       |                       |  |
|------|-------------------------|-----------------------------------|----------------|----|----------|-----------------------------------------------------------------------------------------------------------------------------------------------------------------------------------------------------------------------------------------------------------------------------------------------------------------------------------------------------|----|-----|----------|-----|-----|---|----|-----------------------------------------------------------------------------------------------------------------------------------|----------------------------------------------------|-----------------------|-----|--|--|-----|--|----|-----------------------|-----------------------|--|
| (32) | Andrade VLG et al, 1994 | Brazil (São Gonçalo municipality) | 1988 (85 days) | CS | Domicile | Cross-sectional study to assess the household characteristics, the social and economic factors for leprosy transmission. A random sample, proportional to the number of leprosy cases in each census tract, was selected. Households with leprosy (group 1) were compared with one neighborhood group (group 2) and another random group (group 3). | PB | 926 | All ages | URB | 137 | P | NA | Group 1 vs Group 2: Education, age, time of residence in the household, number of rooms.                                          | Type of housing                                    | Aggregation           | 31  |  |  | 92  |  | LR | OR                    | 1.841 (0.825, 4.108 ) |  |
|      |                         |                                   |                |    |          |                                                                                                                                                                                                                                                                                                                                                     |    |     |          |     |     |   |    |                                                                                                                                   | House or flat                                      | House or flat         | 106 |  |  | 303 |  |    | 1.0                   |                       |  |
|      |                         |                                   |                |    |          |                                                                                                                                                                                                                                                                                                                                                     |    |     |          |     |     |   |    |                                                                                                                                   | Size of household                                  | ≤ 50m2                | 79  |  |  | 259 |  |    | 0.888 (0.524, 1.505 ) |                       |  |
|      |                         |                                   |                |    |          |                                                                                                                                                                                                                                                                                                                                                     |    |     |          |     |     |   |    |                                                                                                                                   | > 50m2                                             | > 50m2                | 58  |  |  | 135 |  |    | 1.0                   |                       |  |
|      |                         |                                   |                |    |          |                                                                                                                                                                                                                                                                                                                                                     |    |     |          |     |     |   |    |                                                                                                                                   | Household floor                                    | Ground/cement         | 64  |  |  | 182 |  |    | 1.552 (0.930, 2.591 ) |                       |  |
|      |                         |                                   |                |    |          |                                                                                                                                                                                                                                                                                                                                                     |    |     |          |     |     |   |    |                                                                                                                                   |                                                    | Carpet, wood, ceramic | 73  |  |  | 212 |  |    | 1.0                   |                       |  |
|      |                         |                                   |                |    |          |                                                                                                                                                                                                                                                                                                                                                     |    |     |          |     |     |   |    |                                                                                                                                   | Water supply                                       | No tap water          | 17  |  |  | 58  |  |    | 1.176 (0.567, 2.441 ) |                       |  |
|      |                         |                                   |                |    |          |                                                                                                                                                                                                                                                                                                                                                     |    |     |          |     |     |   |    |                                                                                                                                   |                                                    | Tap water             | 120 |  |  | 336 |  |    | 1.0                   |                       |  |
|      |                         |                                   |                |    |          |                                                                                                                                                                                                                                                                                                                                                     |    |     |          |     |     |   |    |                                                                                                                                   | Number of rooms                                    | ≤ 2                   | 42  |  |  | 184 |  |    | 0.589*(0.356, 0.964 ) | 0.757 (0.376, 1.526 ) |  |
|      |                         |                                   |                |    |          |                                                                                                                                                                                                                                                                                                                                                     |    |     |          |     |     |   |    |                                                                                                                                   | > 2                                                | > 2                   | 95  |  |  | 210 |  |    | 1.0                   | 1.00                  |  |
|      |                         |                                   |                |    |          |                                                                                                                                                                                                                                                                                                                                                     |    |     |          |     |     |   |    |                                                                                                                                   | Number of residents                                | ≥ 5                   | 63  |  |  | 127 |  |    | 1.351 (0.859, 2.126 ) |                       |  |
|      |                         |                                   |                |    |          |                                                                                                                                                                                                                                                                                                                                                     |    |     |          |     |     |   |    |                                                                                                                                   |                                                    | 1 to 4                | 74  |  |  | 267 |  |    | 1.0                   |                       |  |
|      |                         |                                   |                |    |          |                                                                                                                                                                                                                                                                                                                                                     |    |     |          |     |     |   |    |                                                                                                                                   | Sweep the house                                    | Once a week           | 5   |  |  | 14  |  |    | 1.261 (0.404, 3.934 ) |                       |  |
|      |                         |                                   |                |    |          |                                                                                                                                                                                                                                                                                                                                                     |    |     |          |     |     |   |    |                                                                                                                                   |                                                    | Everyday              | 132 |  |  | 380 |  |    | 1.0                   |                       |  |
|      |                         |                                   |                |    |          |                                                                                                                                                                                                                                                                                                                                                     |    |     |          |     |     |   |    |                                                                                                                                   | Age (head of the household)                        | > 40 years-old        | 99  |  |  | 185 |  |    | 4.326*(2.546, 7.352 ) | 2.660*(1.321, 5.362 ) |  |
|      |                         |                                   |                |    |          |                                                                                                                                                                                                                                                                                                                                                     |    |     |          |     |     |   |    |                                                                                                                                   |                                                    | ≤ 39 years-old        | 38  |  |  | 209 |  |    | 1.0                   | 1.00                  |  |
|      |                         |                                   |                |    |          |                                                                                                                                                                                                                                                                                                                                                     |    |     |          |     |     |   |    |                                                                                                                                   | Education (head of the household)                  | Primary/middle-school | 123 |  |  | 305 |  |    | 2.707*(1.212, 6.046 ) | 2.543*(1.063, 6.085 ) |  |
|      |                         |                                   |                |    |          |                                                                                                                                                                                                                                                                                                                                                     |    |     |          |     |     |   |    |                                                                                                                                   |                                                    | High-school           | 14  |  |  | 89  |  |    | 1.0                   | 1.00                  |  |
|      |                         |                                   |                |    |          |                                                                                                                                                                                                                                                                                                                                                     |    |     |          |     |     |   |    |                                                                                                                                   | Sex (head of the household)                        | Female                | 50  |  |  | 148 |  |    | 0.924 (0.593, 1.441 ) |                       |  |
|      |                         |                                   |                |    |          |                                                                                                                                                                                                                                                                                                                                                     |    |     |          |     |     |   |    |                                                                                                                                   |                                                    | Male                  | 87  |  |  | 246 |  |    | 1.0                   |                       |  |
|      |                         |                                   |                |    |          |                                                                                                                                                                                                                                                                                                                                                     |    |     |          |     |     |   |    |                                                                                                                                   | Time living in the address (head of the household) | >11 years             | 76  |  |  | 167 |  |    | 2.759*(1.610, 5.208 ) | 1474 (0.714, 3.039 )  |  |
|      |                         |                                   |                |    |          |                                                                                                                                                                                                                                                                                                                                                     |    |     |          |     |     |   |    |                                                                                                                                   |                                                    | ≤ 10 years            | 61  |  |  | 227 |  |    | 1.0                   | 1.00                  |  |
|      |                         |                                   |                |    |          |                                                                                                                                                                                                                                                                                                                                                     |    |     |          |     |     |   |    |                                                                                                                                   | Use of shoes (head of the household)               | None or sandals       | 104 |  |  | 286 |  |    | 0.949 (0.504, 1.782 ) |                       |  |
|      |                         |                                   |                |    |          |                                                                                                                                                                                                                                                                                                                                                     |    |     |          |     |     |   |    |                                                                                                                                   |                                                    | Shoes                 | 33  |  |  | 108 |  |    | 1.0                   |                       |  |
|      |                         |                                   |                |    |          |                                                                                                                                                                                                                                                                                                                                                     |    |     |          |     |     |   |    | Group 1 vs Group 3: Education, age, time of residence in the household, type of housing, floor, water supply and number of rooms. | Type of housing                                    | Aggregation           | 31  |  |  | 27  |  |    | 4.127*(2.344, 7.267 ) | 3.950*(1.790, 8.717 ) |  |
|      |                         |                                   |                |    |          |                                                                                                                                                                                                                                                                                                                                                     |    |     |          |     |     |   |    |                                                                                                                                   |                                                    | House or flat         | 106 |  |  | 368 |  |    | 1.0                   | 1.00                  |  |
|      |                         |                                   |                |    |          |                                                                                                                                                                                                                                                                                                                                                     |    |     |          |     |     |   |    |                                                                                                                                   | Size of household                                  | <=50m2                | 79  |  |  | 244 |  |    | 0.879 (0.563, 1.278 ) |                       |  |
|      |                         |                                   |                |    |          |                                                                                                                                                                                                                                                                                                                                                     |    |     |          |     |     |   |    |                                                                                                                                   | >50m2                                              | >50m2                 | 58  |  |  | 151 |  |    | 1.0                   |                       |  |
|      |                         |                                   |                |    |          |                                                                                                                                                                                                                                                                                                                                                     |    |     |          |     |     |   |    |                                                                                                                                   | Household floor                                    | Ground/cement         | 64  |  |  | 226 |  |    | 0.620*(0.414, 0.923 ) | 0.872 (0.491, 1.548 ) |  |
|      |                         |                                   |                |    |          |                                                                                                                                                                                                                                                                                                                                                     |    |     |          |     |     |   |    |                                                                                                                                   |                                                    | Carpet, wood, ceramic | 73  |  |  | 169 |  |    | 1.0                   | 1.00                  |  |
|      |                         |                                   |                |    |          |                                                                                                                                                                                                                                                                                                                                                     |    |     |          |     |     |   |    |                                                                                                                                   | Water supply                                       | No tap water          | 17  |  |  | 85  |  |    | 0.421*(0.226, 0.787 ) | 0.372*(0.151, 0.914 ) |  |
|      |                         |                                   |                |    |          |                                                                                                                                                                                                                                                                                                                                                     |    |     |          |     |     |   |    |                                                                                                                                   |                                                    | Tap water             | 120 |  |  | 310 |  |    | 1.0                   | 1.00                  |  |
|      |                         |                                   |                |    |          |                                                                                                                                                                                                                                                                                                                                                     |    |     |          |     |     |   |    |                                                                                                                                   | Number of rooms                                    | <= 2                  | 42  |  |  | 156 |  |    | 0.694 (0.453, 1.061 ) | 0.694 (0.453, 1.061 ) |  |
|      |                         |                                   |                |    |          |                                                                                                                                                                                                                                                                                                                                                     |    |     |          |     |     |   |    |                                                                                                                                   | > 2                                                | > 2                   | 95  |  |  | 239 |  |    | 1.0                   | 1.00                  |  |
|      |                         |                                   |                |    |          |                                                                                                                                                                                                                                                                                                                                                     |    |     |          |     |     |   |    |                                                                                                                                   | Number of residents                                | >= 5                  | 63  |  |  | 161 |  |    | 1.243 (0.832, 1.856 ) |                       |  |
|      |                         |                                   |                |    |          |                                                                                                                                                                                                                                                                                                                                                     |    |     |          |     |     |   |    |                                                                                                                                   |                                                    | 1 to 4                | 74  |  |  | 234 |  |    | 1.0                   |                       |  |
|      |                         |                                   |                |    |          |                                                                                                                                                                                                                                                                                                                                                     |    |     |          |     |     |   |    |                                                                                                                                   | House sweeping                                     | Once a week           | 5   |  |  | 18  |  |    | 0.861 (0.313, 2.370 ) |                       |  |
|      |                         |                                   |                |    |          |                                                                                                                                                                                                                                                                                                                                                     |    |     |          |     |     |   |    |                                                                                                                                   |                                                    | Everyday              | 132 |  |  | 377 |  |    | 1.0                   |                       |  |
|      |                         |                                   |                |    |          |                                                                                                                                                                                                                                                                                                                                                     |    |     |          |     |     |   |    |                                                                                                                                   | Age (head of the household)                        | > 40 years-old        | 99  |  |  | 206 |  |    | 2.527*(1.601, 3.989 ) | 2.071*(1.092, 3.927 ) |  |
|      |                         |                                   |                |    |          |                                                                                                                                                                                                                                                                                                                                                     |    |     |          |     |     |   |    |                                                                                                                                   |                                                    | <=39 years-old        | 38  |  |  | 189 |  |    | 1.0                   | 1.00                  |  |

<sup>4</sup> Survey, Education and Treatment

|                                                                                                                                                                                                                                                                                                                                                                                                                                            |                       |                                           |           |    |            |                                                                                                                                                                                                                                       |          |                                                                       |                         |    |                                                      |   |                                                     |                |                                                                        |                              |             |   |             |        |  |                   |                                                |                       |                       |
|--------------------------------------------------------------------------------------------------------------------------------------------------------------------------------------------------------------------------------------------------------------------------------------------------------------------------------------------------------------------------------------------------------------------------------------------|-----------------------|-------------------------------------------|-----------|----|------------|---------------------------------------------------------------------------------------------------------------------------------------------------------------------------------------------------------------------------------------|----------|-----------------------------------------------------------------------|-------------------------|----|------------------------------------------------------|---|-----------------------------------------------------|----------------|------------------------------------------------------------------------|------------------------------|-------------|---|-------------|--------|--|-------------------|------------------------------------------------|-----------------------|-----------------------|
|                                                                                                                                                                                                                                                                                                                                                                                                                                            |                       |                                           |           |    |            |                                                                                                                                                                                                                                       |          |                                                                       |                         |    |                                                      |   |                                                     |                | Education (head of the household)                                      | Primary/middle-school        | 123         |   |             | 313    |  |                   |                                                | 2.106*(1.023, 4.350 ) | 1.776 (0.788, 4.003 ) |
|                                                                                                                                                                                                                                                                                                                                                                                                                                            |                       |                                           |           |    |            |                                                                                                                                                                                                                                       |          |                                                                       |                         |    |                                                      |   |                                                     |                | Sex (head of the household)                                            | High-school                  | 14          |   |             | 82     |  |                   |                                                | 1.0                   | 1.00                  |
|                                                                                                                                                                                                                                                                                                                                                                                                                                            |                       |                                           |           |    |            |                                                                                                                                                                                                                                       |          |                                                                       |                         |    |                                                      |   |                                                     |                |                                                                        | Female                       | 50          |   |             | 113    |  |                   |                                                | 1.497 (0.985, 2.277 ) |                       |
|                                                                                                                                                                                                                                                                                                                                                                                                                                            |                       |                                           |           |    |            |                                                                                                                                                                                                                                       |          |                                                                       |                         |    |                                                      |   |                                                     |                |                                                                        | Male                         | 87          |   |             | 282    |  |                   |                                                | 1.0                   |                       |
|                                                                                                                                                                                                                                                                                                                                                                                                                                            |                       |                                           |           |    |            |                                                                                                                                                                                                                                       |          |                                                                       |                         |    |                                                      |   |                                                     |                | Time living in the address (head of the household)                     | >11 years                    | 76          |   |             | 141    |  |                   |                                                | 2.466*(1.510, 4.208 ) | 1.519 (0.868, 2.659 ) |
|                                                                                                                                                                                                                                                                                                                                                                                                                                            |                       |                                           |           |    |            |                                                                                                                                                                                                                                       |          |                                                                       |                         |    |                                                      |   |                                                     |                |                                                                        | <= 10 years                  | 61          |   |             | 254    |  |                   |                                                | 1.0                   | 1.00                  |
|                                                                                                                                                                                                                                                                                                                                                                                                                                            |                       |                                           |           |    |            |                                                                                                                                                                                                                                       |          |                                                                       |                         |    |                                                      |   |                                                     |                | Use of shoes (head of the household)                                   | None or sandals              | 104         |   |             | 279    |  |                   |                                                | 1.204 (0.698, 2.078 ) |                       |
|                                                                                                                                                                                                                                                                                                                                                                                                                                            |                       |                                           |           |    |            |                                                                                                                                                                                                                                       |          |                                                                       |                         |    |                                                      |   |                                                     |                |                                                                        | Shoes                        | 33          |   |             | 116    |  |                   |                                                | 1.0                   |                       |
| Households, age and educational level are determinant factors for leprosy morbidity in this area. Comparing domiciles with leprosy (Group I) with their neighbors (Group II) and with domiciles outside the leprosy focus areas (Group III), the chance of a household have the disease when the head of the family have low educational level is 2.5 times higher than those with higher educational level when residing in the same area |                       |                                           |           |    |            |                                                                                                                                                                                                                                       |          |                                                                       |                         |    |                                                      |   |                                                     |                |                                                                        |                              |             |   |             |        |  |                   |                                                |                       |                       |
| (16)                                                                                                                                                                                                                                                                                                                                                                                                                                       | Ranade MG et al, 1995 | India (State of Maharashtra, 27 villages) | 1952-1886 | CH | Individual | Study on risk of leprosy among healthy contacts, based on annual surveys conducted in the area, covering about 85% of the population.                                                                                                 | Contacts | 12,489 (in 1952), 22,377 (in 1986), 6,284 healthy cont acts (overall) | NA (adult and children) | NA | 331 (secondary cases), 1,074 (cases in non-contacts) | I | 23.5 / 1,000 (prevalence in 1952); 4.46 / 1,000 PYR | N              | Household contact                                                      | No                           | 1,074       |   | 1.98/1,000  | -      |  | Contingency table | RR‡                                            | 1.00                  |                       |
|                                                                                                                                                                                                                                                                                                                                                                                                                                            |                       |                                           |           |    |            |                                                                                                                                                                                                                                       |          |                                                                       |                         |    |                                                      |   |                                                     |                |                                                                        | Yes                          | 331         |   | 4.46/1,000  | 5,953  |  |                   |                                                | 2.26*(1.99, 2.55)     |                       |
|                                                                                                                                                                                                                                                                                                                                                                                                                                            |                       |                                           |           |    |            |                                                                                                                                                                                                                                       |          |                                                                       |                         |    |                                                      |   |                                                     |                | Closeness of contact (parent, child, grand parent, grandchild, spouse) | Not close (overall contacts) | 109         |   |             | 2,166  |  |                   |                                                | 1.00                  |                       |
|                                                                                                                                                                                                                                                                                                                                                                                                                                            |                       |                                           |           |    |            |                                                                                                                                                                                                                                       |          |                                                                       |                         |    |                                                      |   |                                                     |                |                                                                        | Close                        | 222         |   |             | 3,787  |  |                   |                                                | 1.05 (0.96, 1.14)     |                       |
|                                                                                                                                                                                                                                                                                                                                                                                                                                            |                       |                                           |           |    |            |                                                                                                                                                                                                                                       |          |                                                                       |                         |    |                                                      |   |                                                     |                |                                                                        | Not close (male contacts)    | 73          |   |             | 1,085  |  |                   |                                                | 1.00                  |                       |
|                                                                                                                                                                                                                                                                                                                                                                                                                                            |                       |                                           |           |    |            |                                                                                                                                                                                                                                       |          |                                                                       |                         |    |                                                      |   |                                                     |                |                                                                        | Close                        | 123         |   |             | 1,790  |  |                   |                                                | 1.01 (0.90, 1.13)     |                       |
|                                                                                                                                                                                                                                                                                                                                                                                                                                            |                       |                                           |           |    |            |                                                                                                                                                                                                                                       |          |                                                                       |                         |    |                                                      |   |                                                     |                |                                                                        | Not close (female contacts)  | 36          |   |             | 1,081  |  |                   |                                                | 1.00                  |                       |
|                                                                                                                                                                                                                                                                                                                                                                                                                                            |                       |                                           |           |    |            |                                                                                                                                                                                                                                       |          |                                                                       |                         |    |                                                      |   |                                                     |                | Sex of contact                                                         | Close                        | 99          |   |             | 1,997  |  |                   |                                                | 1.13*(1.02, 1.26)     |                       |
|                                                                                                                                                                                                                                                                                                                                                                                                                                            |                       |                                           |           |    |            |                                                                                                                                                                                                                                       |          |                                                                       |                         |    |                                                      |   |                                                     |                |                                                                        | Female                       | 135         |   |             | 3,078  |  |                   |                                                | 1.00                  |                       |
|                                                                                                                                                                                                                                                                                                                                                                                                                                            |                       |                                           |           |    |            |                                                                                                                                                                                                                                       |          |                                                                       |                         |    |                                                      |   |                                                     |                |                                                                        | Male                         | 196         |   |             | 2,875  |  |                   |                                                | 1.52*(1.23, 1.88)     |                       |
| In the general population, risk of leprosy was over two times higher among household contacts than non-contacts; among contacts, chance of lepro sy was higher among males than females, but closeness of contact was a significant risk only in female contacts                                                                                                                                                                           |                       |                                           |           |    |            |                                                                                                                                                                                                                                       |          |                                                                       |                         |    |                                                      |   |                                                     |                |                                                                        |                              |             |   |             |        |  |                   |                                                |                       |                       |
| (33)                                                                                                                                                                                                                                                                                                                                                                                                                                       | Kumar A et al, 2001   | India (Agra district)                     | 1999-2000 | CS | Individual | One year survey in domiciles and schools in each of the 90 villages/urban units from Agra, aiming to study the persistently high case detection remain in the region and the socio-demographic factors related to leprosy prevalence. | PB       | 17,161 (13,320 rural and 3,841 urban)                                 | <15to 69+ years         | MX | 95                                                   | P | 5.5/1,000; 1.25/1,000 (in <15 year olds)            | Age, sex, area | Area <sup>5</sup>                                                      | Urban                        | 15          |   | 3.9/1,000   | 13,320 |  | LR                | OR (combining data from rural and urban areas) | -                     | -                     |
|                                                                                                                                                                                                                                                                                                                                                                                                                                            |                       |                                           |           |    |            |                                                                                                                                                                                                                                       |          |                                                                       |                         |    |                                                      |   |                                                     |                |                                                                        | Rural                        | 80          |   | 6.0/1,000   | 3,841  |  |                   |                                                | -                     | -                     |
|                                                                                                                                                                                                                                                                                                                                                                                                                                            |                       |                                           |           |    |            |                                                                                                                                                                                                                                       |          |                                                                       |                         |    |                                                      |   |                                                     |                |                                                                        | House cleanliness            | No          | - |             | -      |  |                   |                                                | 1.00                  | 1.00                  |
|                                                                                                                                                                                                                                                                                                                                                                                                                                            |                       |                                           |           |    |            |                                                                                                                                                                                                                                       |          |                                                                       |                         |    |                                                      |   |                                                     |                |                                                                        | Yes                          | -           |   |             | -      |  |                   |                                                | 0.48*(0.32, 0.73)     | 0.49*(0.33, 0.75)     |
|                                                                                                                                                                                                                                                                                                                                                                                                                                            |                       |                                           |           |    |            |                                                                                                                                                                                                                                       |          |                                                                       |                         |    |                                                      |   |                                                     |                |                                                                        | Formal education             | No          | - |             | -      |  |                   |                                                | 1.00                  | 1.00                  |
|                                                                                                                                                                                                                                                                                                                                                                                                                                            |                       |                                           |           |    |            |                                                                                                                                                                                                                                       |          |                                                                       |                         |    |                                                      |   |                                                     |                |                                                                        | Yes                          | -           |   |             | -      |  |                   |                                                | 0.95 (0.61, 1.49)     | 0.56*(0.35, 0.90)     |
|                                                                                                                                                                                                                                                                                                                                                                                                                                            |                       |                                           |           |    |            |                                                                                                                                                                                                                                       |          |                                                                       |                         |    |                                                      |   |                                                     |                |                                                                        | Occupation                   | Blue collar | - |             | -      |  |                   |                                                | 1.00                  | 1.00                  |
|                                                                                                                                                                                                                                                                                                                                                                                                                                            |                       |                                           |           |    |            |                                                                                                                                                                                                                                       |          |                                                                       |                         |    |                                                      |   |                                                     |                |                                                                        | Housewives/students/others   | -           |   |             | -      |  |                   |                                                | 0.45*(0.29, 0.71)     | 00.53*(0.28, 1.02)    |
|                                                                                                                                                                                                                                                                                                                                                                                                                                            |                       |                                           |           |    |            |                                                                                                                                                                                                                                       |          |                                                                       |                         |    |                                                      |   |                                                     |                | Rural area:                                                            |                              |             |   |             |        |  |                   |                                                |                       |                       |
|                                                                                                                                                                                                                                                                                                                                                                                                                                            |                       |                                           |           |    |            |                                                                                                                                                                                                                                       |          |                                                                       |                         |    |                                                      |   |                                                     |                | Age                                                                    | Under 15 years               | 8           |   | 1.3/1,000   | 6,494  |  |                   |                                                |                       |                       |
|                                                                                                                                                                                                                                                                                                                                                                                                                                            |                       |                                           |           |    |            |                                                                                                                                                                                                                                       |          |                                                                       |                         |    |                                                      |   |                                                     |                |                                                                        | 15 to 29                     | 11          |   | 3.8/1,000   | 2,915  |  |                   |                                                |                       |                       |
|                                                                                                                                                                                                                                                                                                                                                                                                                                            |                       |                                           |           |    |            |                                                                                                                                                                                                                                       |          |                                                                       |                         |    |                                                      |   |                                                     |                |                                                                        | 30 to 44                     | 16          |   | 8.3/1,000   | 1,939  |  |                   |                                                |                       |                       |
|                                                                                                                                                                                                                                                                                                                                                                                                                                            |                       |                                           |           |    |            |                                                                                                                                                                                                                                       |          |                                                                       |                         |    |                                                      |   |                                                     |                |                                                                        | 45 to 59                     | 21          |   | 18.6/1,000  | 1,131  |  |                   |                                                |                       |                       |
|                                                                                                                                                                                                                                                                                                                                                                                                                                            |                       |                                           |           |    |            |                                                                                                                                                                                                                                       |          |                                                                       |                         |    |                                                      |   |                                                     |                |                                                                        | 59 or more                   | 24          |   | 28.5/1,000  | 841    |  |                   |                                                |                       |                       |
|                                                                                                                                                                                                                                                                                                                                                                                                                                            |                       |                                           |           |    |            |                                                                                                                                                                                                                                       |          |                                                                       |                         |    |                                                      |   |                                                     |                | Sex                                                                    | Male                         | 56          |   | 8.9/1,000   | 6,310  |  |                   |                                                |                       |                       |
|                                                                                                                                                                                                                                                                                                                                                                                                                                            |                       |                                           |           |    |            |                                                                                                                                                                                                                                       |          |                                                                       |                         |    |                                                      |   |                                                     |                |                                                                        | Female                       | 24          |   | 3.4/1,000   | 7,010  |  |                   |                                                |                       |                       |
|                                                                                                                                                                                                                                                                                                                                                                                                                                            |                       |                                           |           |    |            |                                                                                                                                                                                                                                       |          |                                                                       |                         |    |                                                      |   |                                                     |                | Education                                                              | None                         | 53          |   | 7.3/1,000   | 7,270  |  |                   |                                                |                       |                       |
|                                                                                                                                                                                                                                                                                                                                                                                                                                            |                       |                                           |           |    |            |                                                                                                                                                                                                                                       |          |                                                                       |                         |    |                                                      |   |                                                     |                |                                                                        | Formal                       | 27          |   | 4.5/1,000*  | 6,050  |  |                   |                                                |                       |                       |
|                                                                                                                                                                                                                                                                                                                                                                                                                                            |                       |                                           |           |    |            |                                                                                                                                                                                                                                       |          |                                                                       |                         |    |                                                      |   |                                                     |                |                                                                        | <=5 years                    | 10          |   | 3.0/1,000   | 3,348  |  |                   |                                                |                       |                       |
|                                                                                                                                                                                                                                                                                                                                                                                                                                            |                       |                                           |           |    |            |                                                                                                                                                                                                                                       |          |                                                                       |                         |    |                                                      |   |                                                     |                |                                                                        | 5-10 years                   | 15          |   | 6.7/1,000   | 2,251  |  |                   |                                                |                       |                       |
|                                                                                                                                                                                                                                                                                                                                                                                                                                            |                       |                                           |           |    |            |                                                                                                                                                                                                                                       |          |                                                                       |                         |    |                                                      |   |                                                     |                |                                                                        | >10 years                    | 2           |   | 4.4/1,000   | 451    |  |                   |                                                |                       |                       |
|                                                                                                                                                                                                                                                                                                                                                                                                                                            |                       |                                           |           |    |            |                                                                                                                                                                                                                                       |          |                                                                       |                         |    |                                                      |   |                                                     |                | Occupation                                                             | Agriculture/blue collar      | 44          |   | 19.7/1,000* | 2,230  |  |                   |                                                |                       |                       |
|                                                                                                                                                                                                                                                                                                                                                                                                                                            |                       |                                           |           |    |            |                                                                                                                                                                                                                                       |          |                                                                       |                         |    |                                                      |   |                                                     |                |                                                                        | Others                       | 36          |   | 3.3/1,000   | 1,090  |  |                   |                                                |                       |                       |
|                                                                                                                                                                                                                                                                                                                                                                                                                                            |                       |                                           |           |    |            |                                                                                                                                                                                                                                       |          |                                                                       |                         |    |                                                      |   |                                                     |                |                                                                        | none                         | 12          |   | 3.1/1,000   | 3,817  |  |                   |                                                |                       |                       |
|                                                                                                                                                                                                                                                                                                                                                                                                                                            |                       |                                           |           |    |            |                                                                                                                                                                                                                                       |          |                                                                       |                         |    |                                                      |   |                                                     |                |                                                                        | students                     | 6           |   | 1.6/1,000   | 3,678  |  |                   |                                                |                       |                       |
|                                                                                                                                                                                                                                                                                                                                                                                                                                            |                       |                                           |           |    |            |                                                                                                                                                                                                                                       |          |                                                                       |                         |    |                                                      |   |                                                     |                |                                                                        | housewives                   | 18          |   | 5.0/1,000   | 3,595  |  |                   |                                                |                       |                       |
|                                                                                                                                                                                                                                                                                                                                                                                                                                            |                       |                                           |           |    |            |                                                                                                                                                                                                                                       |          |                                                                       |                         |    |                                                      |   |                                                     |                | Religion                                                               | Hindu                        | 78          |   | 6.7/1,000   | 11,565 |  |                   |                                                |                       |                       |





|                                                                                                                                                                                                                           |                             |                                                                               |                       |    |            |                                                                                                                                                                                                                                                                                                                                                                                                                                                                                                                                                                                   |    |                               |           |    |     |   |                                     |                                                                                                                                                                                                                                                                                                                             |                   |                                                         |                      |                   |                   |                   |                    |                   |    |                   |                   |      |
|---------------------------------------------------------------------------------------------------------------------------------------------------------------------------------------------------------------------------|-----------------------------|-------------------------------------------------------------------------------|-----------------------|----|------------|-----------------------------------------------------------------------------------------------------------------------------------------------------------------------------------------------------------------------------------------------------------------------------------------------------------------------------------------------------------------------------------------------------------------------------------------------------------------------------------------------------------------------------------------------------------------------------------|----|-------------------------------|-----------|----|-----|---|-------------------------------------|-----------------------------------------------------------------------------------------------------------------------------------------------------------------------------------------------------------------------------------------------------------------------------------------------------------------------------|-------------------|---------------------------------------------------------|----------------------|-------------------|-------------------|-------------------|--------------------|-------------------|----|-------------------|-------------------|------|
| (17)                                                                                                                                                                                                                      | Bakker MI et al, 2006       | Indonesia (five islands: Tampung, Pelokang, Kembanglemari, Sailus and Sapuka) | 2000-2004 (6 surveys) | CH | Individual | Cohort study on factors associated with leprosy incidence, as part of a study on the impact of rifampicin prophylaxis on the disease incidence.                                                                                                                                                                                                                                                                                                                                                                                                                                   | PB | 4,903 (177,569 person-months) | All ages  | NA | 44  | I | 2.98 ( 95% CI 2.2, 4.0) / 1,000 PYR | (A): sex, household size, serological status in 2000 and contact status by classification of index patient, adjusted for each other + intervention (rifampicin chemoprophylaxis)                                                                                                                                            | Sex               | Female                                                  | 17                   | 0.7%              | 2.04 (1.27, 3.29) | 2,594             | 99.3%              | CX                | HR | 1.0               | 1.0 <sup>12</sup> |      |
|                                                                                                                                                                                                                           |                             |                                                                               |                       |    |            |                                                                                                                                                                                                                                                                                                                                                                                                                                                                                                                                                                                   |    |                               |           |    |     |   |                                     | Male                                                                                                                                                                                                                                                                                                                        | 27                | 1.2%                                                    | 4.17 (2.86, 6.08)    | 2,265             | 98.8%             | 2.01 (1.10, 3.70) | 2.21 (1.20, 4.09)  |                   |    |                   |                   |      |
|                                                                                                                                                                                                                           |                             |                                                                               |                       |    |            |                                                                                                                                                                                                                                                                                                                                                                                                                                                                                                                                                                                   |    |                               |           |    |     |   |                                     | Age                                                                                                                                                                                                                                                                                                                         | 0-5               | 1                                                       |                      | 0.47 (0.07, 3.33) |                   |                   | 0.13* (0.02, 0.95) |                   |    |                   |                   |      |
|                                                                                                                                                                                                                           |                             |                                                                               |                       |    |            |                                                                                                                                                                                                                                                                                                                                                                                                                                                                                                                                                                                   |    |                               |           |    |     |   |                                     |                                                                                                                                                                                                                                                                                                                             | 6-14              | 14                                                      |                      | 3.70 (2.19, 6.24) |                   |                   | 1.0                |                   |    |                   |                   |      |
|                                                                                                                                                                                                                           |                             |                                                                               |                       |    |            |                                                                                                                                                                                                                                                                                                                                                                                                                                                                                                                                                                                   |    |                               |           |    |     |   |                                     |                                                                                                                                                                                                                                                                                                                             | 15-29             | 14                                                      |                      | 3.53 (2.09, 5.95) |                   |                   | 0.92 (0.44, 1.94)  |                   |    |                   |                   |      |
|                                                                                                                                                                                                                           |                             |                                                                               |                       |    |            |                                                                                                                                                                                                                                                                                                                                                                                                                                                                                                                                                                                   |    |                               |           |    |     |   |                                     |                                                                                                                                                                                                                                                                                                                             | 30-44             | 10                                                      |                      | 3.81 (2.05, 7.08) |                   |                   | 1.01 (0.45, 2.28)  |                   |    |                   |                   |      |
|                                                                                                                                                                                                                           |                             |                                                                               |                       |    |            |                                                                                                                                                                                                                                                                                                                                                                                                                                                                                                                                                                                   |    |                               |           |    |     |   |                                     |                                                                                                                                                                                                                                                                                                                             | 45-59             | 3                                                       |                      | 2.16 (0.70, 6.70) |                   |                   | 0.55 (0.16, 1.92)  |                   |    |                   |                   |      |
|                                                                                                                                                                                                                           |                             |                                                                               |                       |    |            |                                                                                                                                                                                                                                                                                                                                                                                                                                                                                                                                                                                   |    |                               |           |    |     |   |                                     |                                                                                                                                                                                                                                                                                                                             | >60               | 2                                                       |                      | 2.24 (0.56, 8.96) |                   |                   | 0.57 (0.13, 2.52)  |                   |    |                   |                   |      |
|                                                                                                                                                                                                                           |                             |                                                                               |                       |    |            |                                                                                                                                                                                                                                                                                                                                                                                                                                                                                                                                                                                   |    |                               |           |    |     |   |                                     |                                                                                                                                                                                                                                                                                                                             | Household members | 1-4                                                     | 0.6%                 | 1.88 (1.04, 3.40) | 1,917             | 99.4%             | 1.0 <sup>11</sup>  |                   |    | 1.0 <sup>12</sup> |                   |      |
|                                                                                                                                                                                                                           |                             |                                                                               |                       |    |            |                                                                                                                                                                                                                                                                                                                                                                                                                                                                                                                                                                                   |    |                               |           |    |     |   |                                     |                                                                                                                                                                                                                                                                                                                             |                   | 5-7                                                     | 0.9%                 | 3.09 (2.02, 4.74) | 2,229             | 99.1%             | 1.71 (0.82, 3.56)  |                   |    | 1.61 (0.77, 3.37) |                   |      |
|                                                                                                                                                                                                                           |                             |                                                                               |                       |    |            |                                                                                                                                                                                                                                                                                                                                                                                                                                                                                                                                                                                   |    |                               |           |    |     |   |                                     |                                                                                                                                                                                                                                                                                                                             |                   | 8-16                                                    | 1.7%                 | 5.61 (3.19, 9.88) | 713               | 98.3%             | 3.47 (1.51, 7.98)  |                   |    | 3.12 (1.34, 7.27) |                   |      |
|                                                                                                                                                                                                                           |                             |                                                                               |                       |    |            |                                                                                                                                                                                                                                                                                                                                                                                                                                                                                                                                                                                   |    |                               |           |    |     |   |                                     |                                                                                                                                                                                                                                                                                                                             | Contact status 1  | No contact <sup>9</sup>                                 |                      | 2.88 (2.00, 4.15) |                   |                   | 1.0 <sup>11</sup>  |                   |    |                   |                   |      |
|                                                                                                                                                                                                                           |                             |                                                                               |                       |    |            |                                                                                                                                                                                                                                                                                                                                                                                                                                                                                                                                                                                   |    |                               |           |    |     |   |                                     |                                                                                                                                                                                                                                                                                                                             |                   | N2 contact                                              | 0.7%                 | 3.31 (1.49, 7.38) | 4,581             | 99.3%             | 1.52 (0.50, 4.59)  |                   |    |                   |                   |      |
|                                                                                                                                                                                                                           |                             |                                                                               |                       |    |            |                                                                                                                                                                                                                                                                                                                                                                                                                                                                                                                                                                                   |    |                               |           |    |     |   |                                     |                                                                                                                                                                                                                                                                                                                             |                   | N1 contact                                              |                      | 1.48 (0.48, 4.60) |                   |                   | 0.72 (0.19, 2.75)  |                   |    |                   |                   |      |
|                                                                                                                                                                                                                           |                             |                                                                               |                       |    |            |                                                                                                                                                                                                                                                                                                                                                                                                                                                                                                                                                                                   |    |                               |           |    |     |   |                                     |                                                                                                                                                                                                                                                                                                                             |                   | Household contact                                       | 2.1%                 | 6.67 (3.00, 14.9) | 278               | 97.9%             | 3.29 (1.11, 9.77)  |                   |    |                   |                   |      |
|                                                                                                                                                                                                                           |                             |                                                                               |                       |    |            |                                                                                                                                                                                                                                                                                                                                                                                                                                                                                                                                                                                   |    |                               |           |    |     |   |                                     |                                                                                                                                                                                                                                                                                                                             | Contact status 2  | No contact (>100m) <sup>10</sup>                        |                      | 2.69 (1.62, 4.46) |                   |                   | 1.0 <sup>11</sup>  |                   |    |                   |                   |      |
|                                                                                                                                                                                                                           |                             |                                                                               |                       |    |            |                                                                                                                                                                                                                                                                                                                                                                                                                                                                                                                                                                                   |    |                               |           |    |     |   |                                     |                                                                                                                                                                                                                                                                                                                             |                   | Buffer contact 75-100 m                                 |                      | 1.75 (0.56, 5.43) |                   |                   | 0.62 (0.18, 2.15)  |                   |    |                   |                   |      |
|                                                                                                                                                                                                                           |                             |                                                                               |                       |    |            |                                                                                                                                                                                                                                                                                                                                                                                                                                                                                                                                                                                   |    |                               |           |    |     |   |                                     |                                                                                                                                                                                                                                                                                                                             |                   | Buffer contact 50-75 m                                  |                      | 4.01 (2.00, 8.01) |                   |                   | 1.51 (0.64, 3.56)  |                   |    |                   |                   |      |
|                                                                                                                                                                                                                           |                             |                                                                               |                       |    |            |                                                                                                                                                                                                                                                                                                                                                                                                                                                                                                                                                                                   |    |                               |           |    |     |   |                                     |                                                                                                                                                                                                                                                                                                                             |                   | Buffer contact 25-50 m                                  |                      | 3.15 (1.50, 6.60) |                   |                   | 1.33 (0.52, 3.42)  |                   |    |                   |                   |      |
|                                                                                                                                                                                                                           |                             |                                                                               |                       |    |            |                                                                                                                                                                                                                                                                                                                                                                                                                                                                                                                                                                                   |    |                               |           |    |     |   |                                     |                                                                                                                                                                                                                                                                                                                             |                   | Buffer contact 1-25 m                                   |                      | 2.10 (0.87, 5.04) |                   |                   | 1.15 (1.36, 3.62)  |                   |    |                   |                   |      |
|                                                                                                                                                                                                                           |                             |                                                                               |                       |    |            |                                                                                                                                                                                                                                                                                                                                                                                                                                                                                                                                                                                   |    |                               |           |    |     |   |                                     |                                                                                                                                                                                                                                                                                                                             |                   | Household contact                                       |                      | 6.67 (3.00, 14.2) |                   |                   | 3.57 (1.18, 10.7)  |                   |    |                   |                   |      |
| The risk among males to develop leprosy was over twice higher than among females. The risk among household contacts was over three times higher in households with more than 7 members compared to 1-4 member households. |                             |                                                                               |                       |    |            |                                                                                                                                                                                                                                                                                                                                                                                                                                                                                                                                                                                   |    |                               |           |    |     |   |                                     |                                                                                                                                                                                                                                                                                                                             |                   |                                                         |                      |                   |                   |                   |                    |                   |    |                   |                   |      |
| (23)                                                                                                                                                                                                                      | Kerr-Pontes LRS et al, 2006 | Brazil (State of Ceará)                                                       | 2002                  | CC | Individual | Study in four municipalities aimed to identify socioeconomic, environmental, and behavioral factors associated with leprosy occurrence in individuals with no contact with leprosy patients. For each case, four age and sex frequency matched individuals, presenting for reasons other than skin problems to the health unit where the case was diagnosed and living in the same municipality as the case, were selected as controls. For multivariate analysis, a hierarchical framework in five blocks (block 1: socioeconomic factors; block 2: environmental factors; block | PB | 1,083                         | >18 years | NA | 222 | - | NA                                  | Bivariate analysis was done accounting for cluster effect of municipalities; multivariate analyses were done in each block, adjusting for all variables in the block (first step), and then, adjusting the socioeconomic block by the statistically significant variables of the four blocks left (second step, shown here) | Block 1:          | Schooling                                               | High                 | 40                | 18                |                   | 244                | 28                | LR | OR                | 1.00              | 1.00 |
|                                                                                                                                                                                                                           |                             |                                                                               |                       |    |            |                                                                                                                                                                                                                                                                                                                                                                                                                                                                                                                                                                                   |    |                               |           |    |     |   |                                     |                                                                                                                                                                                                                                                                                                                             |                   | Middle                                                  | 56                   | 25                |                   | 226               | 26                 | 1.51 (0.93, 2.47) |    |                   | 1.50 (0.91, 2.50) |      |
|                                                                                                                                                                                                                           |                             |                                                                               |                       |    |            |                                                                                                                                                                                                                                                                                                                                                                                                                                                                                                                                                                                   |    |                               |           |    |     |   |                                     |                                                                                                                                                                                                                                                                                                                             |                   | Low                                                     | 130                  | 58                |                   | 387               | 45                 | 2.05*(1.29, 3.27) |    |                   | 1.87*(1.29, 2.74) |      |
|                                                                                                                                                                                                                           |                             |                                                                               |                       |    |            |                                                                                                                                                                                                                                                                                                                                                                                                                                                                                                                                                                                   |    |                               |           |    |     |   |                                     |                                                                                                                                                                                                                                                                                                                             |                   | Food shortage at any time in life                       | Never experienced    | 161               | 72                |                   | 687                | 81                |    |                   | 1.00              | 1.00 |
|                                                                                                                                                                                                                           |                             |                                                                               |                       |    |            |                                                                                                                                                                                                                                                                                                                                                                                                                                                                                                                                                                                   |    |                               |           |    |     |   |                                     |                                                                                                                                                                                                                                                                                                                             |                   | Experienced                                             | 63                   | 28                |                   | 163               | 19                 | 1.65*(1.11, 2.42) |    |                   | 1.54*(1.45, 1.63) |      |
|                                                                                                                                                                                                                           |                             |                                                                               |                       |    |            |                                                                                                                                                                                                                                                                                                                                                                                                                                                                                                                                                                                   |    |                               |           |    |     |   |                                     |                                                                                                                                                                                                                                                                                                                             |                   | Access to safe drinking water in the past 10 years      | Yes                  | 133               | 59                |                   | 546                | 65                |    |                   | 1.00              |      |
|                                                                                                                                                                                                                           |                             |                                                                               |                       |    |            |                                                                                                                                                                                                                                                                                                                                                                                                                                                                                                                                                                                   |    |                               |           |    |     |   |                                     |                                                                                                                                                                                                                                                                                                                             |                   | No                                                      | 91                   | 41                |                   | 298               | 35                 | 1.17 (0.96, 1.43) |    |                   |                   |      |
|                                                                                                                                                                                                                           |                             |                                                                               |                       |    |            |                                                                                                                                                                                                                                                                                                                                                                                                                                                                                                                                                                                   |    |                               |           |    |     |   |                                     |                                                                                                                                                                                                                                                                                                                             |                   | Sewage disposal in the past 10 years                    | Yes                  | 180               | 81                |                   | 741                | 87                |    |                   | 1.00              |      |
|                                                                                                                                                                                                                           |                             |                                                                               |                       |    |            |                                                                                                                                                                                                                                                                                                                                                                                                                                                                                                                                                                                   |    |                               |           |    |     |   |                                     |                                                                                                                                                                                                                                                                                                                             |                   | No                                                      | 41                   | 19                |                   | 111               | 13                 | 1.44 (0.95, 2.80) |    |                   |                   |      |
|                                                                                                                                                                                                                           |                             |                                                                               |                       |    |            |                                                                                                                                                                                                                                                                                                                                                                                                                                                                                                                                                                                   |    |                               |           |    |     |   |                                     |                                                                                                                                                                                                                                                                                                                             |                   | Sand/mud in the floor in the past 10 years              | No                   | 182               | 81                |                   | 737                | 86                |    |                   | 1.00              |      |
|                                                                                                                                                                                                                           |                             |                                                                               |                       |    |            |                                                                                                                                                                                                                                                                                                                                                                                                                                                                                                                                                                                   |    |                               |           |    |     |   |                                     |                                                                                                                                                                                                                                                                                                                             |                   | Yes                                                     | 44                   | 20                |                   | 119               | 14                 | 1.46*(1.04, 2.06) |    |                   |                   |      |
|                                                                                                                                                                                                                           |                             |                                                                               |                       |    |            |                                                                                                                                                                                                                                                                                                                                                                                                                                                                                                                                                                                   |    |                               |           |    |     |   |                                     |                                                                                                                                                                                                                                                                                                                             | Block 2:          | Household crowding (currently)                          | 0-3 persons per room | 200               | 89                |                   | 782                | 92                |    |                   | 1.00              |      |
|                                                                                                                                                                                                                           |                             |                                                                               |                       |    |            |                                                                                                                                                                                                                                                                                                                                                                                                                                                                                                                                                                                   |    |                               |           |    |     |   |                                     |                                                                                                                                                                                                                                                                                                                             |                   | 4 or more persons per room                              | 26                   | 12                |                   | 71                | 8                  | 1.43 (0.64, 3.20) |    |                   |                   |      |
|                                                                                                                                                                                                                           |                             |                                                                               |                       |    |            |                                                                                                                                                                                                                                                                                                                                                                                                                                                                                                                                                                                   |    |                               |           |    |     |   |                                     |                                                                                                                                                                                                                                                                                                                             |                   | Has/had animals in the house/yard in the past 10 years  | No                   | 39                | 17                |                   | 203                | 24                |    |                   | 1.00              |      |
|                                                                                                                                                                                                                           |                             |                                                                               |                       |    |            |                                                                                                                                                                                                                                                                                                                                                                                                                                                                                                                                                                                   |    |                               |           |    |     |   |                                     |                                                                                                                                                                                                                                                                                                                             |                   | Works/worked in forest in the past 10 years             | Yes                  | 184               | 83                |                   | 649                | 77                |    |                   | 1.48 (0.77, 2.86) |      |
|                                                                                                                                                                                                                           |                             |                                                                               |                       |    |            |                                                                                                                                                                                                                                                                                                                                                                                                                                                                                                                                                                                   |    |                               |           |    |     |   |                                     |                                                                                                                                                                                                                                                                                                                             |                   | No                                                      | 148                  | 69                |                   | 647               | 76                 | 1.00              |    |                   |                   |      |
|                                                                                                                                                                                                                           |                             |                                                                               |                       |    |            |                                                                                                                                                                                                                                                                                                                                                                                                                                                                                                                                                                                   |    |                               |           |    |     |   |                                     |                                                                                                                                                                                                                                                                                                                             |                   | Works/worked in agricultural field in the past 10 years | Yes                  | 68                | 31                |                   | 200                | 24                |    |                   | 1.43 (0.90, 2.29) |      |
|                                                                                                                                                                                                                           |                             |                                                                               |                       |    |            |                                                                                                                                                                                                                                                                                                                                                                                                                                                                                                                                                                                   |    |                               |           |    |     |   |                                     |                                                                                                                                                                                                                                                                                                                             |                   | No                                                      | 81                   | 36                |                   | 392               | 46                 | 1.00              |    |                   |                   |      |
|                                                                                                                                                                                                                           |                             |                                                                               |                       |    |            |                                                                                                                                                                                                                                                                                                                                                                                                                                                                                                                                                                                   |    |                               |           |    |     |   |                                     |                                                                                                                                                                                                                                                                                                                             |                   | Yes                                                     | 144                  | 64                |                   | 463               | 54                 | 1.48 (0.79, 2.77) |    |                   |                   |      |

<sup>9</sup> reference category for contacts in household, N1 (direct neighbours) and N2 (next neighbours)

<sup>11</sup> adjusted by intervention

|                                                                                                                                                                                                                                                                                                                                                                                       |                     |                                                  |           |    |            |                                                                                                                                                                       |          |                        |                  |     |     |   |                                                |                                                           |                                                                                      |                       |     |    |                                |        |    |                   |                           |                    |                    |
|---------------------------------------------------------------------------------------------------------------------------------------------------------------------------------------------------------------------------------------------------------------------------------------------------------------------------------------------------------------------------------------|---------------------|--------------------------------------------------|-----------|----|------------|-----------------------------------------------------------------------------------------------------------------------------------------------------------------------|----------|------------------------|------------------|-----|-----|---|------------------------------------------------|-----------------------------------------------------------|--------------------------------------------------------------------------------------|-----------------------|-----|----|--------------------------------|--------|----|-------------------|---------------------------|--------------------|--------------------|
|                                                                                                                                                                                                                                                                                                                                                                                       |                     |                                                  |           |    |            | 3: behavioral factors; block 4: demographic factors and block 5: vaccination) was defined.                                                                            |          |                        |                  |     |     |   |                                                |                                                           | Frequency of changing bed linen (current)                                            | Biweekly              | 132 | 58 |                                | 609    | 72 |                   |                           | 1.00               | 1.00               |
|                                                                                                                                                                                                                                                                                                                                                                                       |                     |                                                  |           |    |            |                                                                                                                                                                       |          |                        |                  |     |     |   |                                                |                                                           | >Biweekly                                                                            |                       | 94  | 42 |                                | 242    | 28 |                   |                           | 1.79* (1.32, 2.43) | 1.81* (1.30, 2.52) |
|                                                                                                                                                                                                                                                                                                                                                                                       |                     |                                                  |           |    |            |                                                                                                                                                                       |          |                        |                  |     |     |   |                                                |                                                           | Sharing its own bed/hammock with others (current)                                    | Yes                   | 100 | 44 |                                | 428    | 50 |                   |                           | 1.00               |                    |
|                                                                                                                                                                                                                                                                                                                                                                                       |                     |                                                  |           |    |            |                                                                                                                                                                       |          |                        |                  |     |     |   |                                                |                                                           | No                                                                                   |                       | 125 | 56 |                                | 426    | 50 |                   |                           | 1.29 (0.93, 1.61)  |                    |
|                                                                                                                                                                                                                                                                                                                                                                                       |                     |                                                  |           |    |            |                                                                                                                                                                       |          |                        |                  |     |     |   |                                                |                                                           | Sharing others bed/hammock with others (current)                                     | Yes                   | 131 | 58 |                                | 526    | 62 |                   |                           | 1.00               |                    |
|                                                                                                                                                                                                                                                                                                                                                                                       |                     |                                                  |           |    |            |                                                                                                                                                                       |          |                        |                  |     |     |   |                                                |                                                           | No                                                                                   |                       | 95  | 42 |                                | 322    | 38 |                   |                           | 1.17 (0.60, 2.30)  |                    |
|                                                                                                                                                                                                                                                                                                                                                                                       |                     |                                                  |           |    |            |                                                                                                                                                                       |          |                        |                  |     |     |   |                                                |                                                           | Weekly regular bath in open water bodies (creek, river or lake) in the past 10 years | No                    | 188 | 83 |                                | 770    | 90 |                   |                           | 1.00               | 1.00               |
|                                                                                                                                                                                                                                                                                                                                                                                       |                     |                                                  |           |    |            |                                                                                                                                                                       |          |                        |                  |     |     |   |                                                |                                                           | Yes                                                                                  |                       | 38  | 17 |                                | 87     | 10 |                   |                           | 1.79*(1.18, 2.70)  | 1.77* (1.12, 2.81) |
|                                                                                                                                                                                                                                                                                                                                                                                       |                     |                                                  |           |    |            |                                                                                                                                                                       |          |                        |                  |     |     |   |                                                | Block 4:                                                  |                                                                                      |                       |     |    |                                |        |    |                   |                           |                    |                    |
|                                                                                                                                                                                                                                                                                                                                                                                       |                     |                                                  |           |    |            |                                                                                                                                                                       |          |                        |                  |     |     |   |                                                | Sex                                                       | Male                                                                                 |                       | 108 | 48 |                                | 348    | 41 |                   |                           | 1.00               | 1.00               |
|                                                                                                                                                                                                                                                                                                                                                                                       |                     |                                                  |           |    |            |                                                                                                                                                                       |          |                        |                  |     |     |   |                                                |                                                           | Female                                                                               |                       | 118 | 52 |                                | 509    | 59 |                   |                           | 0.84 (0.68, 1.04)  | 0.97 (0.70, 1.34)  |
|                                                                                                                                                                                                                                                                                                                                                                                       |                     |                                                  |           |    |            |                                                                                                                                                                       |          |                        |                  |     |     |   |                                                | Age (years) - continuous in the multivariable analysis    | < 30                                                                                 |                       | 44  | 20 |                                | 228    | 27 |                   |                           | 1.00               | 1.01 (1.00, 1.02)  |
|                                                                                                                                                                                                                                                                                                                                                                                       |                     |                                                  |           |    |            |                                                                                                                                                                       |          |                        |                  |     |     |   |                                                |                                                           | 30–39                                                                                |                       | 33  | 15 |                                | 167    | 19 |                   |                           | 1.02 (0.72, 1.45)  |                    |
|                                                                                                                                                                                                                                                                                                                                                                                       |                     |                                                  |           |    |            |                                                                                                                                                                       |          |                        |                  |     |     |   |                                                |                                                           | >40                                                                                  |                       | 149 | 66 |                                | 462    | 54 |                   |                           | 1.67 (0.77, 3.64)  |                    |
|                                                                                                                                                                                                                                                                                                                                                                                       |                     |                                                  |           |    |            |                                                                                                                                                                       |          |                        |                  |     |     |   |                                                | Skin colour                                               | White                                                                                |                       | 76  | 34 |                                | 404    | 47 |                   |                           | 1.00               |                    |
|                                                                                                                                                                                                                                                                                                                                                                                       |                     |                                                  |           |    |            |                                                                                                                                                                       |          |                        |                  |     |     |   |                                                |                                                           | Brown/black                                                                          |                       | 148 | 66 |                                | 450    | 53 |                   |                           | 1.88 (0.99, 3.56)  |                    |
|                                                                                                                                                                                                                                                                                                                                                                                       |                     |                                                  |           |    |            |                                                                                                                                                                       |          |                        |                  |     |     |   |                                                | Marital status                                            | Not married                                                                          |                       | 78  | 35 |                                | 298    | 35 |                   |                           | 1.00               |                    |
|                                                                                                                                                                                                                                                                                                                                                                                       |                     |                                                  |           |    |            |                                                                                                                                                                       |          |                        |                  |     |     |   |                                                |                                                           | Married                                                                              |                       | 144 | 65 |                                | 552    | 65 |                   |                           | 0.95 (0.84, 1.06)  |                    |
| Crowding or sharing the bed or hammock with other household members did not show a significant association with leprosy. Low education level, ever having experienced food shortage, bathing weekly in open water bodies (creek, river and/or lake) 10 years previously, and a low frequency of changing bed linen or hammock (>biweekly) currently were all associated with leprosy. |                     |                                                  |           |    |            |                                                                                                                                                                       |          |                        |                  |     |     |   |                                                |                                                           |                                                                                      |                       |     |    |                                |        |    |                   |                           |                    |                    |
| (36)                                                                                                                                                                                                                                                                                                                                                                                  | Moet FJ et al, 2006 | Bangladesh (Districts of Nilphamari and Rangpur) | 2002-2003 | CS | Individual | Study on prevalence of leprosy among contacts of leprosy patients and its association with different characteristics in contacts and patients (part of COLEP project) | Contacts | 21,870 contacts        | 5 to 50+ years   | RUR | 159 | P | 7.3 (95% CI 6.2,8.5) / 1,000                   | Age, type of leprosy, physical distance, genetic distance | Sex                                                                                  | Female                | NA  |    | -                              | NA     | NA | LR                | OR                        | 1.00               |                    |
|                                                                                                                                                                                                                                                                                                                                                                                       |                     |                                                  |           |    |            |                                                                                                                                                                       |          |                        |                  |     |     |   |                                                |                                                           | Male                                                                                 |                       |     |    | -                              |        |    |                   |                           | 1.26 (0.92, 1.72)  |                    |
|                                                                                                                                                                                                                                                                                                                                                                                       |                     |                                                  |           |    |            |                                                                                                                                                                       |          |                        |                  |     |     |   |                                                |                                                           | Age, years                                                                           | 5- 9                  |     |    | 3.3 ( 1.7, 5.9) <sup>14</sup>  |        |    |                   | 1.00                      | 1.00               |                    |
|                                                                                                                                                                                                                                                                                                                                                                                       |                     |                                                  |           |    |            |                                                                                                                                                                       |          |                        |                  |     |     |   |                                                |                                                           |                                                                                      | 10-14                 |     |    | 6.5 ( 4.1, 9.7) <sup>14</sup>  |        |    |                   | 1.97 (0.96, 4.04)         | 2.02 (0.98, 4.15)  |                    |
|                                                                                                                                                                                                                                                                                                                                                                                       |                     |                                                  |           |    |            |                                                                                                                                                                       |          |                        |                  |     |     |   |                                                |                                                           |                                                                                      | 15-19                 |     |    | 9.8 ( 6.3,14.5) <sup>14</sup>  |        |    |                   | 2.98 (1.46, 6.09)         | 3.08 (1.49, 6.34)  |                    |
|                                                                                                                                                                                                                                                                                                                                                                                       |                     |                                                  |           |    |            |                                                                                                                                                                       |          |                        |                  |     |     |   |                                                |                                                           |                                                                                      | 20-29                 |     |    | 5.0 ( 3.0, 7.9) <sup>14</sup>  |        |    |                   | 1.53 (0.73, 3.22)         | 1.72 (0.81, 3.63)  |                    |
|                                                                                                                                                                                                                                                                                                                                                                                       |                     |                                                  |           |    |            |                                                                                                                                                                       |          |                        |                  |     |     |   |                                                |                                                           |                                                                                      | >30                   |     |    | 9.3 ( 7.4,11.6) <sup>14</sup>  |        |    |                   | 2.84 (1.51, 5.34)         | 2.94 (1.56, 5.54)  |                    |
|                                                                                                                                                                                                                                                                                                                                                                                       |                     |                                                  |           |    |            |                                                                                                                                                                       |          |                        |                  |     |     |   |                                                | Physical distance <sup>13</sup>                           | N2+S                                                                                 |                       |     |    | 4.9 ( 3.8, 6.3) <sup>14</sup>  |        |    |                   | 1.00                      | 1.00               |                    |
|                                                                                                                                                                                                                                                                                                                                                                                       |                     |                                                  |           |    |            |                                                                                                                                                                       |          |                        |                  |     |     |   |                                                |                                                           | R+N1                                                                                 |                       |     |    | 8.7 ( 6.5,11.5) <sup>14</sup>  |        |    |                   | 1.79 (1.23, 2.60)         | 1.69 (1.16, 2.47)  |                    |
|                                                                                                                                                                                                                                                                                                                                                                                       |                     |                                                  |           |    |            |                                                                                                                                                                       |          |                        |                  |     |     |   |                                                |                                                           | K                                                                                    |                       |     |    | 7.5 ( 3.9,13.1) <sup>14</sup>  |        |    |                   | 1.54 (0.83, 2.87)         | 1.05 (0.52, 2.13)  |                    |
|                                                                                                                                                                                                                                                                                                                                                                                       |                     |                                                  |           |    |            |                                                                                                                                                                       |          |                        |                  |     |     |   |                                                |                                                           | KR                                                                                   |                       |     |    | 15.6 (10.6,22.0) <sup>14</sup> |        |    |                   | 3.21 (2.08, 4.96)         | 2.44 (1.44, 4.12)  |                    |
| In this study, the contacts living under the same roof as patients and sharing the same kitchen had a higher risk than other contacts living under the same roof and next door neighbors, who, again, had a higher risk than neighbors of neighbors.                                                                                                                                  |                     |                                                  |           |    |            |                                                                                                                                                                       |          |                        |                  |     |     |   |                                                |                                                           |                                                                                      |                       |     |    |                                |        |    |                   |                           |                    |                    |
| (18)                                                                                                                                                                                                                                                                                                                                                                                  | Kumar A et al, 2007 | India                                            | 1999-2005 | CH | Individual | Study on the leprosy-free population (in a survey conducted in 1999 to 2001), resurveyed from 2 to over 4 years after the initial survey.                             | PB       | 42,113 / 123,951.2 PYR | <15 to 44+ years | MX  | 77  | I | 6.2/10,000 overall; 4.5/10,000 in <15years old | No                                                        | Contact with leprosy patient                                                         | non-familial contacts | 56  |    | 4.6/10,000                     | 41,119 |    |                   | RR                        | NA (p<0.01)        |                    |
|                                                                                                                                                                                                                                                                                                                                                                                       |                     |                                                  |           |    |            |                                                                                                                                                                       |          |                        |                  |     |     |   |                                                |                                                           |                                                                                      | familial contacts     | 21  |    | 67.6/10,000                    | 994    |    |                   |                           | NA (p<0.005)       |                    |
|                                                                                                                                                                                                                                                                                                                                                                                       |                     |                                                  |           |    |            |                                                                                                                                                                       |          |                        |                  |     |     |   |                                                |                                                           | Age                                                                                  | < 15                  | 25  |    | 4.5/10,000                     | 18,745 |    |                   |                           |                    |                    |
|                                                                                                                                                                                                                                                                                                                                                                                       |                     |                                                  |           |    |            |                                                                                                                                                                       |          |                        |                  |     |     |   |                                                |                                                           |                                                                                      | 15 to 29              | 15  |    | 5.2/10,000                     | 9,857  |    |                   |                           |                    |                    |
|                                                                                                                                                                                                                                                                                                                                                                                       |                     |                                                  |           |    |            |                                                                                                                                                                       |          |                        |                  |     |     |   |                                                |                                                           |                                                                                      | 30 to 44              | 17  |    | 7.8/10,000                     | 7,446  |    |                   |                           |                    |                    |
|                                                                                                                                                                                                                                                                                                                                                                                       |                     |                                                  |           |    |            |                                                                                                                                                                       |          |                        |                  |     |     |   |                                                |                                                           | Sex                                                                                  | 44 or more            | 20  |    | 11.2/10,000                    | 6,065  |    |                   |                           |                    |                    |
|                                                                                                                                                                                                                                                                                                                                                                                       |                     |                                                  |           |    |            |                                                                                                                                                                       |          |                        |                  |     |     |   |                                                |                                                           |                                                                                      | Males                 | 29  |    | 6.6/10,000                     | 14,806 |    |                   |                           |                    |                    |
|                                                                                                                                                                                                                                                                                                                                                                                       |                     |                                                  |           |    |            |                                                                                                                                                                       |          |                        |                  |     |     |   |                                                |                                                           |                                                                                      | Females               | 48  |    | 6.0/10,000                     | 27,307 |    |                   |                           |                    |                    |
|                                                                                                                                                                                                                                                                                                                                                                                       |                     |                                                  |           |    |            |                                                                                                                                                                       |          |                        |                  |     |     |   |                                                |                                                           | Follow-up time among non-familial contacts                                           | 1 year                |     |    |                                |        |    | Survival analysis | Survival probability (SE) | 0.9997 (0.0001)    |                    |
|                                                                                                                                                                                                                                                                                                                                                                                       |                     |                                                  |           |    |            |                                                                                                                                                                       |          |                        |                  |     |     |   |                                                |                                                           |                                                                                      | 2 years               |     |    |                                |        |    |                   | 0.9991 (0.0001)           |                    |                    |
|                                                                                                                                                                                                                                                                                                                                                                                       |                     |                                                  |           |    |            |                                                                                                                                                                       |          |                        |                  |     |     |   |                                                |                                                           |                                                                                      | 3 years               |     |    |                                |        |    |                   | 0.9986 (0.002)            |                    |                    |
|                                                                                                                                                                                                                                                                                                                                                                                       |                     |                                                  |           |    |            |                                                                                                                                                                       |          |                        |                  |     |     |   |                                                |                                                           | Follow-up time among familial contacts                                               | 1 year                |     |    |                                |        |    |                   | 0.9948 (0.002)            |                    |                    |
|                                                                                                                                                                                                                                                                                                                                                                                       |                     |                                                  |           |    |            |                                                                                                                                                                       |          |                        |                  |     |     |   |                                                |                                                           |                                                                                      | 2 years               |     |    |                                |        |    |                   | 0.9842 (0.004)            |                    |                    |

<sup>13</sup> KR, contact sharing roof and kitchen (“household”) with the index case; K, contact sharing the kitchen; N1, next-door neighbor, not sharing kitchen or roof; N2, neighbor of neighbor

<sup>14</sup> new cases / 1,000 contacts (95% CI)



|                                                                                                                                                                                                                  |                         |                                       |           |    |              |                                                                                                                                                                                                                                                                                |          |                                                     |          |     |                       |                 |                                                                                |                                                                           |                                                                                                                                                                                                                                                |                                                                                                                                                                                                                         |                        |                                  |    |                          |                                  |                                        |                   |                                                                                                                                                                                              |                                                                                                                                                                                              |  |
|------------------------------------------------------------------------------------------------------------------------------------------------------------------------------------------------------------------|-------------------------|---------------------------------------|-----------|----|--------------|--------------------------------------------------------------------------------------------------------------------------------------------------------------------------------------------------------------------------------------------------------------------------------|----------|-----------------------------------------------------|----------|-----|-----------------------|-----------------|--------------------------------------------------------------------------------|---------------------------------------------------------------------------|------------------------------------------------------------------------------------------------------------------------------------------------------------------------------------------------------------------------------------------------|-------------------------------------------------------------------------------------------------------------------------------------------------------------------------------------------------------------------------|------------------------|----------------------------------|----|--------------------------|----------------------------------|----------------------------------------|-------------------|----------------------------------------------------------------------------------------------------------------------------------------------------------------------------------------------|----------------------------------------------------------------------------------------------------------------------------------------------------------------------------------------------|--|
| Higher incidence of leprosy was found among familial contacts (FC), than among non-familial contacts, and risk increased with age.                                                                               |                         |                                       |           |    |              |                                                                                                                                                                                                                                                                                |          |                                                     |          |     |                       |                 |                                                                                | 3 years                                                                   |                                                                                                                                                                                                                                                |                                                                                                                                                                                                                         |                        |                                  |    |                          |                                  |                                        |                   | 0.9792 (0.005)                                                                                                                                                                               |                                                                                                                                                                                              |  |
| (19)                                                                                                                                                                                                             | Fischer EAJ et al, 2008 | Bangladesh (District of Nilphamari)   | 1989-2003 | CH | Individual   | Retrospective cohort study to identify spatial distribution of leprosy patients detected in 1989-2003 and environmental risk factors associated with leprosy.                                                                                                                  | PB       | 1,500,000 approximately                             | NA       | MX  | 11,060                | I               | 0.49 / 1,000 PYR                                                               | Distance to road, distance to river, distance to clinic, distance to town | Distance to road (linear)<br>Distance to road (squared)<br>Distance to river (linear)<br>Distance to river (squared)<br>Distance to clinic (linear)<br>Distance to clinic (squared)<br>Distance to town (linear)<br>Distance to town (squared) |                                                                                                                                                                                                                         | NA                     | NA                               | NA | NA                       | NA                               | PR                                     | RR                | 0.911 (0.894, 0.929)<br>0.995 (0.993, 0.996)<br>1.028 (0.988, 1.070)<br>0.998 (0.990, 1.005)<br>0.963 (0.939, 0.987)<br>0.997 (0.995, 0.999)<br>0.890 (0.866, 0.914)<br>0.990 (0.988, 0.993) | 0.934 (0.915, 0.953)<br>0.996 (0.999, 1.002)<br>1.033 (0.992, 1.075)<br>0.998 (0.996, 1.012)<br>1.006 (0.981, 1.033)<br>1.000 (0.999, 1.004)<br>0.922 (0.895, 0.950)<br>0.993 (0.990, 0.995) |  |
| The study shows association of new leprosy cases rate with proximity to towns, especially in the first kilometers, and proximity to roads; no relationship was found with the proximity to a clinic or to rivers |                         |                                       |           |    |              |                                                                                                                                                                                                                                                                                |          |                                                     |          |     |                       |                 |                                                                                |                                                                           |                                                                                                                                                                                                                                                |                                                                                                                                                                                                                         |                        |                                  |    |                          |                                  |                                        |                   |                                                                                                                                                                                              |                                                                                                                                                                                              |  |
| (42)                                                                                                                                                                                                             | Lana FCF et al, 2009    | Brazil/Minas Gerais                   | 2003-2006 | EC | Municipality | The study aims to analyze the association between leprosy detection rates and Human Development Index (HDI).                                                                                                                                                                   | PB       | 853                                                 | All ages | MX  | NA                    | I <sup>15</sup> | NA                                                                             | No                                                                        | HDI                                                                                                                                                                                                                                            | Low (0.694)<br>Median (0.694-0.750)<br>High (>0.750)                                                                                                                                                                    |                        |                                  |    |                          |                                  |                                        | Contingency table | Chi square test<br>Bonferroni correction: for total population (8df) and only high versus low HDI (4df)                                                                                      | 21,51 (8df; p=0.008)<br>16,53 (4df; p=0.017)                                                                                                                                                 |  |
| Municipalities with high IDH had lower leprosy detection rates than municipalities with low IDH, which suggest that cities with worst socio-economic conditions have less control of the endemy.                 |                         |                                       |           |    |              |                                                                                                                                                                                                                                                                                |          |                                                     |          |     |                       |                 |                                                                                |                                                                           |                                                                                                                                                                                                                                                |                                                                                                                                                                                                                         |                        |                                  |    |                          |                                  |                                        |                   |                                                                                                                                                                                              |                                                                                                                                                                                              |  |
| (43)                                                                                                                                                                                                             | Imbiriba EB et al, 2009 | Brazil (city of Manaus)               | 1998-2004 | EC | Census tract | Ecological study on geographical distribution of leprosy and associated factors, based on 1,536 census tracts in the city of Manaus. The dependent variable was the smoothed average detection rate, categorized as 0, for < 4 cases/10,000, or 1, for ≥ 4 cases/10,000 cases. | PB       | 1,451,958 (population in 2001); 1,536 census tracts | All ages | URB | 4,104                 | I               | 4.21 / 10,000                                                                  | Cases in <15 year old children, life conditions index                     | Cases in <15 year old children<br><br>Life Conditions Index                                                                                                                                                                                    | 0<br>1<br>2+<br>Fair<br>Middle<br>Middle-low<br>Low                                                                                                                                                                     | NA                     | NA                               | NA | NA                       | NA                               | LR                                     | OR                | 1.00<br>1.76* (1.31, 2.36)<br>2.44* (1.41, 4.20)<br>1.00<br>1.67* (1.14, 2.44)<br>3.05* (2.15, 4.32)<br>4.43* (3.14, 6.24)                                                                   |                                                                                                                                                                                              |  |
| Higher risk of leprosy was independently associated with higher occurrence of cases in <15 year old children and worse conditions of life                                                                        |                         |                                       |           |    |              |                                                                                                                                                                                                                                                                                |          |                                                     |          |     |                       |                 |                                                                                |                                                                           |                                                                                                                                                                                                                                                |                                                                                                                                                                                                                         |                        |                                  |    |                          |                                  |                                        |                   |                                                                                                                                                                                              |                                                                                                                                                                                              |  |
| (37)                                                                                                                                                                                                             | Durães SMB et al, 2010  | Brazil (Duque de Caxias municipality) | 2004-2007 | CS | Individual   | Cross-sectional study on contacts of 107 index cases                                                                                                                                                                                                                           | Contacts | 1,040                                               | All ages | URB | 211 coprevalent cases | P               |                                                                                | Degree of kinship, type of contact                                        | Degree of kinship<br><br>Type of contact                                                                                                                                                                                                       | Other (including non-relatives)<br>1st degree (parents, children, siblings)<br>Peridomiciliary<br>Domiciliary                                                                                                           | 87<br>124<br>48<br>163 | 14.3%<br>28.8%<br>12.2%<br>23.3% |    | 522<br>307<br>347<br>482 | 85.7%<br>71.2%<br>87.8%<br>74.7% | LR                                     | OR                | 1.00<br>2.42* (1.75, 3.35)<br>1.00<br>2.44* (1.69, 3.40)                                                                                                                                     | 1.00<br>2.05 (NA)<br>1.00<br>2.00 (NA)                                                                                                                                                       |  |
| Household contacts showed higher risk of leprosy, independent on kinship                                                                                                                                         |                         |                                       |           |    |              |                                                                                                                                                                                                                                                                                |          |                                                     |          |     |                       |                 |                                                                                |                                                                           |                                                                                                                                                                                                                                                |                                                                                                                                                                                                                         |                        |                                  |    |                          |                                  |                                        |                   |                                                                                                                                                                                              |                                                                                                                                                                                              |  |
| (44)                                                                                                                                                                                                             | Queiroz JW et al, 2010  | Brazil (Mossoró municipality)         | 1995-2006 | EC | Census tract | Study conducted on 170 census tracts, where 808 leprosy cases were selected out of 1,293 cases diagnosed between 1995 and 2006, and the dwellings were geocoded. Spatial linear regression                                                                                     | PB       | 213,841 (2000 Census); 170 census tracts            | All ages | URB | 808                   | I <sup>16</sup> | 0,0 to 31.7 / 10,000 (average yearly detection rate, across 170 census tracts) | NA                                                                        | Factors extracted by principal components analysis of ten socioeconomic variables; the higher the factor score, the better the socio-economic conditions                                                                                       | First factor, correlated with presence of basic sanitation (existence of piped water, presence of toilets in the house and trash collection)<br>Second factor, expressing the level of literacy and income (mean family | NA                     | NA                               | NA | NA                       | NA                               | SAR (spatial autoregressive lag model) | RR                | β = -0.0978 (0.0331)<br><br>NA                                                                                                                                                               |                                                                                                                                                                                              |  |

<sup>15</sup> Leprosy detection rates were categorized in low (<0.2/10000), median (0.2-0.99/10000), high (1-1.99/10000), very high (2-3.99/10000) and hyperendemic (>4/10000).

<sup>16</sup> average yearly detection rate, across 170 census tracts

|  |  |  |  |  |  |                                                                                                     |  |  |  |  |  |  |  |  |  |                                                                                                                                                                                           |  |  |  |  |  |  |  |  |  |  |  |  |  |  |  |  |  |  |  |  |  |  |  |  |  |  |  |  |  |  |  |  |  |  |  |  |  |  |  |  |  |  |  |  |  |  |  |  |  |  |  |  |  |  |  |  |  |  |  |  |  |  |  |  |  |  |  |  |  |  |  |  |  |  |  |  |  |  |  |  |  |  |  |  |  |  |  |  |  |  |  |  |  |  |  |  |  |  |  |  |  |  |  |  |  |  |  |  |  |  |  |  |  |  |  |  |  |  |  |  |  |  |  |  |  |  |  |  |  |  |  |  |  |  |  |  |  |  |  |  |  |  |  |  |  |  |  |  |  |  |  |  |  |  |  |  |  |  |  |  |  |  |  |  |  |  |  |  |  |  |  |  |  |  |  |  |  |  |  |  |  |  |  |  |  |  |  |  |  |  |  |  |  |  |  |  |  |  |  |  |  |  |  |  |  |  |  |  |  |  |  |  |  |  |  |  |  |  |  |  |  |  |  |  |  |  |  |  |  |  |  |  |  |  |  |  |  |  |  |  |  |  |  |  |  |  |  |  |  |  |  |  |  |  |  |  |  |  |  |  |  |  |  |  |  |  |  |  |  |  |  |  |  |  |  |  |  |  |  |  |  |  |  |  |  |  |  |  |  |  |  |  |  |  |  |  |  |  |  |  |  |  |  |  |  |  |  |  |  |  |  |  |  |  |  |  |  |  |  |  |  |  |  |  |  |  |  |  |  |  |  |  |  |  |  |  |  |  |  |  |  |  |  |  |  |  |  |  |  |  |  |  |  |  |  |  |  |  |  |  |  |  |  |  |  |  |  |  |  |  |  |  |  |  |  |  |  |  |  |  |  |  |  |  |  |  |  |  |  |  |  |  |  |  |  |  |  |  |  |  |  |  |  |  |  |  |  |  |  |  |  |  |  |  |  |  |  |  |  |  |  |  |  |  |  |  |  |  |  |  |  |  |  |  |  |  |  |  |  |  |  |  |  |  |  |  |  |  |  |  |  |  |  |  |  |  |  |  |  |  |  |  |  |  |  |  |  |  |  |  |  |  |  |  |  |  |  |  |  |  |  |  |  |  |  |  |  |  |  |  |  |  |  |  |  |  |  |  |  |  |  |  |  |  |  |  |  |  |  |  |  |  |  |  |  |  |  |  |  |  |  |  |  |  |  |  |  |  |  |  |  |  |  |  |  |  |  |  |  |  |  |  |  |  |  |  |  |  |  |  |  |  |  |  |  |  |  |  |  |  |  |  |  |  |  |  |  |  |  |  |  |  |  |  |  |  |  |  |  |  |  |  |  |  |  |  |  |  |  |  |  |  |  |  |  |  |  |  |  |  |  |  |  |  |  |  |  |  |  |  |  |  |  |  |  |  |  |  |  |  |  |  |  |  |  |  |  |  |  |  |  |  |  |  |  |  |  |  |  |  |  |  |  |  |  |  |  |  |  |  |  |  |  |  |  |  |  |  |  |  |  |  |  |  |  |  |  |  |  |  |  |  |  |  |  |  |  |  |  |  |  |  |  |  |  |  |  |  |  |  |  |  |  |  |  |  |  |  |  |  |  |  |  |  |  |  |  |  |  |  |  |  |  |  |  |  |  |  |  |  |  |  |  |  |  |  |  |  |  |  |  |  |  |  |  |  |  |  |  |  |  |  |  |  |  |  |  |  |  |  |  |  |  |  |  |  |  |  |  |  |  |  |  |  |  |  |  |  |  |  |  |  |  |  |  |  |  |  |  |  |  |  |  |  |  |  |  |  |  |  |  |  |  |  |  |  |  |  |  |  |  |  |  |  |  |  |  |  |  |  |  |  |  |  |  |  |  |  |  |  |  |  |  |  |  |  |  |  |  |  |  |  |  |  |  |  |  |  |  |  |  |  |  |  |  |  |  |  |  |  |  |  |  |  |  |  |  |  |  |  |  |  |  |  |  |  |  |  |  |  |  |  |  |  |  |  |  |  |  |  |  |  |  |  |  |  |  |  |  |  |  |  |  |  |  |  |  |  |  |  |  |  |  |  |  |  |  |  |  |  |  |  |  |  |  |  |  |  |  |  |  |  |  |  |  |  |  |  |  |  |  |  |  |  |  |  |  |  |  |  |  |  |  |  |  |  |  |  |  |  |  |  |  |  |  |  |  |  |  |  |  |  |  |  |  |  |  |  |  |  |  |  |  |  |  |  |  |  |  |  |  |  |  |  |  |  |  |  |  |  |  |  |  |  |  |  |  |  |  |  |  |  |  |  |  |  |  |  |  |  |  |  |  |  |  |  |  |  |  |  |  |  |  |  |  |  |  |  |  |  |  |  |  |  |  |  |  |  |  |  |  |  |  |  |  |  |  |  |  |  |  |  |  |  |  |  |  |  |  |  |  |  |  |  |  |  |  |  |  |  |  |  |  |  |  |  |  |  |  |  |  |  |  |  |  |  |  |  |  |  |  |  |  |  |  |  |  |  |  |  |  |  |  |  |  |  |  |  |  |  |  |  |  |  |  |  |  |  |  |  |  |  |  |  |  |  |  |  |  |  |  |  |  |  |  |  |  |  |  |  |  |  |  |  |  |  |  |  |  |  |  |  |  |  |  |  |  |  |  |  |  |  |  |  |  |  |  |  |  |  |  |  |  |  |  |  |  |  |  |  |  |  |  |  |  |  |  |  |  |  |  |  |  |  |  |  |  |  |  |  |  |  |  |  |  |  |  |  |  |  |  |  |  |  |  |  |  |  |  |  |  |  |  |  |  |  |  |  |  |  |  |  |  |  |  |  |  |  |  |  |  |  |  |  |  |  |  |  |  |  |  |  |  |  |  |  |  |  |  |  |  |  |  |  |  |  |  |  |  |  |  |  |  |  |  |  |  |  |  |  |  |  |  |  |  |  |  |  |  |  |  |  |  |  |  |  |  |  |  |  |  |  |  |  |  |  |  |  |  |  |  |  |  |  |  |  |  |  |  |  |  |  |  |  |  |  |  |  |  |  |  |  |  |  |  |  |  |  |  |  |  |  |  |  |  |  |  |  |  |  |  |  |  |  |  |  |  |  |  |  |  |  |  |  |  |  |  |  |  |  |  |  |  |  |  |  |  |  |  |  |  |  |  |  |  |  |  |  |  |  |  |  |  |  |  |  |  |  |  |  |  |  |  |  |  |  |  |  |  |  |  |  |  |  |  |  |  |  |  |  |  |  |  |  |  |  |  |  |  |  |  |  |  |  |  |  |  |  |  |  |  |  |  |  |  |  |  |  |  |  |  |  |  |  |  |  |  |  |  |  |  |  |  |  |  |  |  |  |  |  |  |  |  |  |  |
|--|--|--|--|--|--|-----------------------------------------------------------------------------------------------------|--|--|--|--|--|--|--|--|--|-------------------------------------------------------------------------------------------------------------------------------------------------------------------------------------------|--|--|--|--|--|--|--|--|--|--|--|--|--|--|--|--|--|--|--|--|--|--|--|--|--|--|--|--|--|--|--|--|--|--|--|--|--|--|--|--|--|--|--|--|--|--|--|--|--|--|--|--|--|--|--|--|--|--|--|--|--|--|--|--|--|--|--|--|--|--|--|--|--|--|--|--|--|--|--|--|--|--|--|--|--|--|--|--|--|--|--|--|--|--|--|--|--|--|--|--|--|--|--|--|--|--|--|--|--|--|--|--|--|--|--|--|--|--|--|--|--|--|--|--|--|--|--|--|--|--|--|--|--|--|--|--|--|--|--|--|--|--|--|--|--|--|--|--|--|--|--|--|--|--|--|--|--|--|--|--|--|--|--|--|--|--|--|--|--|--|--|--|--|--|--|--|--|--|--|--|--|--|--|--|--|--|--|--|--|--|--|--|--|--|--|--|--|--|--|--|--|--|--|--|--|--|--|--|--|--|--|--|--|--|--|--|--|--|--|--|--|--|--|--|--|--|--|--|--|--|--|--|--|--|--|--|--|--|--|--|--|--|--|--|--|--|--|--|--|--|--|--|--|--|--|--|--|--|--|--|--|--|--|--|--|--|--|--|--|--|--|--|--|--|--|--|--|--|--|--|--|--|--|--|--|--|--|--|--|--|--|--|--|--|--|--|--|--|--|--|--|--|--|--|--|--|--|--|--|--|--|--|--|--|--|--|--|--|--|--|--|--|--|--|--|--|--|--|--|--|--|--|--|--|--|--|--|--|--|--|--|--|--|--|--|--|--|--|--|--|--|--|--|--|--|--|--|--|--|--|--|--|--|--|--|--|--|--|--|--|--|--|--|--|--|--|--|--|--|--|--|--|--|--|--|--|--|--|--|--|--|--|--|--|--|--|--|--|--|--|--|--|--|--|--|--|--|--|--|--|--|--|--|--|--|--|--|--|--|--|--|--|--|--|--|--|--|--|--|--|--|--|--|--|--|--|--|--|--|--|--|--|--|--|--|--|--|--|--|--|--|--|--|--|--|--|--|--|--|--|--|--|--|--|--|--|--|--|--|--|--|--|--|--|--|--|--|--|--|--|--|--|--|--|--|--|--|--|--|--|--|--|--|--|--|--|--|--|--|--|--|--|--|--|--|--|--|--|--|--|--|--|--|--|--|--|--|--|--|--|--|--|--|--|--|--|--|--|--|--|--|--|--|--|--|--|--|--|--|--|--|--|--|--|--|--|--|--|--|--|--|--|--|--|--|--|--|--|--|--|--|--|--|--|--|--|--|--|--|--|--|--|--|--|--|--|--|--|--|--|--|--|--|--|--|--|--|--|--|--|--|--|--|--|--|--|--|--|--|--|--|--|--|--|--|--|--|--|--|--|--|--|--|--|--|--|--|--|--|--|--|--|--|--|--|--|--|--|--|--|--|--|--|--|--|--|--|--|--|--|--|--|--|--|--|--|--|--|--|--|--|--|--|--|--|--|--|--|--|--|--|--|--|--|--|--|--|--|--|--|--|--|--|--|--|--|--|--|--|--|--|--|--|--|--|--|--|--|--|--|--|--|--|--|--|--|--|--|--|--|--|--|--|--|--|--|--|--|--|--|--|--|--|--|--|--|--|--|--|--|--|--|--|--|--|--|--|--|--|--|--|--|--|--|--|--|--|--|--|--|--|--|--|--|--|--|--|--|--|--|--|--|--|--|--|--|--|--|--|--|--|--|--|--|--|--|--|--|--|--|--|--|--|--|--|--|--|--|--|--|--|--|--|--|--|--|--|--|--|--|--|--|--|--|--|--|--|--|--|--|--|--|--|--|--|--|--|--|--|--|--|--|--|--|--|--|--|--|--|--|--|--|--|--|--|--|--|--|--|--|--|--|--|--|--|--|--|--|--|--|--|--|--|--|--|--|--|--|--|--|--|--|--|--|--|--|--|--|--|--|--|--|--|--|--|--|--|--|--|--|--|--|--|--|--|--|--|--|--|--|--|--|--|--|--|--|--|--|--|--|--|--|--|--|--|--|--|--|--|--|--|--|--|--|--|--|--|--|--|--|--|--|--|--|--|--|--|--|--|--|--|--|--|--|--|--|--|--|--|--|--|--|--|--|--|--|--|--|--|--|--|--|--|--|--|--|--|--|--|--|--|--|--|--|--|--|--|--|--|--|--|--|--|--|--|--|--|--|--|--|--|--|--|--|--|--|--|--|--|--|--|--|--|--|--|--|--|--|--|--|--|--|--|--|--|--|--|--|--|--|--|--|--|--|--|--|--|--|--|--|--|--|--|--|--|--|--|--|--|--|--|--|--|--|--|--|--|--|--|--|--|--|--|--|--|--|--|--|--|--|--|--|--|--|--|--|--|--|--|--|--|--|--|--|--|--|--|--|--|--|--|--|--|--|--|--|--|--|--|--|--|--|--|--|--|--|--|--|--|--|--|--|--|--|--|--|--|--|--|--|--|--|--|--|--|--|--|--|--|--|--|--|--|--|--|--|--|--|--|--|--|--|--|--|--|--|--|--|--|--|--|--|--|--|--|--|--|--|--|--|--|--|--|--|--|--|--|--|--|--|--|--|--|--|--|--|--|--|--|--|--|--|--|--|--|--|--|--|--|--|--|--|--|--|--|--|--|--|--|--|--|--|--|--|--|--|--|--|--|--|--|--|--|--|--|--|--|--|--|--|--|--|--|--|--|--|--|--|--|--|--|--|--|--|--|--|--|--|--|--|--|--|--|--|--|--|--|--|--|--|--|--|--|--|--|--|--|--|--|--|--|--|--|--|--|--|--|--|--|--|--|--|--|--|--|--|--|--|--|--|--|--|--|--|--|--|--|--|--|--|--|--|--|--|--|--|--|--|--|--|--|--|--|--|--|--|--|--|--|--|--|--|--|--|--|--|--|--|--|--|--|--|--|--|--|--|--|--|--|--|--|--|--|--|--|--|--|--|--|--|--|--|--|--|--|--|--|--|--|--|--|--|--|--|--|--|--|--|--|--|--|--|--|--|--|--|--|--|--|--|--|--|--|--|--|--|--|--|--|--|--|--|--|--|--|--|--|--|--|--|--|--|--|--|--|--|--|--|--|--|--|--|--|--|--|--|--|--|--|--|--|--|--|--|--|--|--|--|--|--|--|--|--|--|--|--|--|--|--|--|--|--|--|--|--|--|--|--|--|--|--|--|--|--|--|--|--|--|--|--|--|--|--|--|--|--|--|--|--|--|--|--|--|--|--|--|--|--|--|--|--|--|--|--|--|--|--|--|--|--|--|--|--|--|--|--|--|--|--|--|--|--|--|--|--|--|--|--|--|--|--|--|--|--|--|
|  |  |  |  |  |  | models were adjusted to assess the association between socio-economic factors and risk of leprosy . |  |  |  |  |  |  |  |  |  | income, years of schooling and number of toilets in the house)<br>Third factor, expressing the level of poverty (lack of access to bank loaning and number of residents in the household) |  |  |  |  |  |  |  |  |  |  |  |  |  |  |  |  |  |  |  |  |  |  |  |  |  |  |  |  |  |  |  |  |  |  |  |  |  |  |  |  |  |  |  |  |  |  |  |  |  |  |  |  |  |  |  |  |  |  |  |  |  |  |  |  |  |  |  |  |  |  |  |  |  |  |  |  |  |  |  |  |  |  |  |  |  |  |  |  |  |  |  |  |  |  |  |  |  |  |  |  |  |  |  |  |  |  |  |  |  |  |  |  |  |  |  |  |  |  |  |  |  |  |  |  |  |  |  |  |  |  |  |  |  |  |  |  |  |  |  |  |  |  |  |  |  |  |  |  |  |  |  |  |  |  |  |  |  |  |  |  |  |  |  |  |  |  |  |  |  |  |  |  |  |  |  |  |  |  |  |  |  |  |  |  |  |  |  |  |  |  |  |  |  |  |  |  |  |  |  |  |  |  |  |  |  |  |  |  |  |  |  |  |  |  |  |  |  |  |  |  |  |  |  |  |  |  |  |  |  |  |  |  |  |  |  |  |  |  |  |  |  |  |  |  |  |  |  |  |  |  |  |  |  |  |  |  |  |  |  |  |  |  |  |  |  |  |  |  |  |  |  |  |  |  |  |  |  |  |  |  |  |  |  |  |  |  |  |  |  |  |  |  |  |  |  |  |  |  |  |  |  |  |  |  |  |  |  |  |  |  |  |  |  |  |  |  |  |  |  |  |  |  |  |  |  |  |  |  |  |  |  |  |  |  |  |  |  |  |  |  |  |  |  |  |  |  |  |  |  |  |  |  |  |  |  |  |  |  |  |  |  |  |  |  |  |  |  |  |  |  |  |  |  |  |  |  |  |  |  |  |  |  |  |  |  |  |  |  |  |  |  |  |  |  |  |  |  |  |  |  |  |  |  |  |  |  |  |  |  |  |  |  |  |  |  |  |  |  |  |  |  |  |  |  |  |  |  |  |  |  |  |  |  |  |  |  |  |  |  |  |  |  |  |  |  |  |  |  |  |  |  |  |  |  |  |  |  |  |  |  |  |  |  |  |  |  |  |  |  |  |  |  |  |  |  |  |  |  |  |  |  |  |  |  |  |  |  |  |  |  |  |  |  |  |  |  |  |  |  |  |  |  |  |  |  |  |  |  |  |  |  |  |  |  |  |  |  |  |  |  |  |  |  |  |  |  |  |  |  |  |  |  |  |  |  |  |  |  |  |  |  |  |  |  |  |  |  |  |  |  |  |  |  |  |  |  |  |  |  |  |  |  |  |  |  |  |  |  |  |  |  |  |  |  |  |  |  |  |  |  |  |  |  |  |  |  |  |  |  |  |  |  |  |  |  |  |  |  |  |  |  |  |  |  |  |  |  |  |  |  |  |  |  |  |  |  |  |  |  |  |  |  |  |  |  |  |  |  |  |  |  |  |  |  |  |  |  |  |  |  |  |  |  |  |  |  |  |  |  |  |  |  |  |  |  |  |  |  |  |  |  |  |  |  |  |  |  |  |  |  |  |  |  |  |  |  |  |  |  |  |  |  |  |  |  |  |  |  |  |  |  |  |  |  |  |  |  |  |  |  |  |  |  |  |  |  |  |  |  |  |  |  |  |  |  |  |  |  |  |  |  |  |  |  |  |  |  |  |  |  |  |  |  |  |  |  |  |  |  |  |  |  |  |  |  |  |  |  |  |  |  |  |  |  |  |  |  |  |  |  |  |  |  |  |  |  |  |  |  |  |  |  |  |  |  |  |  |  |  |  |  |  |  |  |  |  |  |  |  |  |  |  |  |  |  |  |  |  |  |  |  |  |  |  |  |  |  |  |  |  |  |  |  |  |  |  |  |  |  |  |  |  |  |  |  |  |  |  |  |  |  |  |  |  |  |  |  |  |  |  |  |  |  |  |  |  |  |  |  |  |  |  |  |  |  |  |  |  |  |  |  |  |  |  |  |  |  |  |  |  |  |  |  |  |  |  |  |  |  |  |  |  |  |  |  |  |  |  |  |  |  |  |  |  |  |  |  |  |  |  |  |  |  |  |  |  |  |  |  |  |  |  |  |  |  |  |  |  |  |  |  |  |  |  |  |  |  |  |  |  |  |  |  |  |  |  |  |  |  |  |  |  |  |  |  |  |  |  |  |  |  |  |  |  |  |  |  |  |  |  |  |  |  |  |  |  |  |  |  |  |  |  |  |  |  |  |  |  |  |  |  |  |  |  |  |  |  |  |  |  |  |  |  |  |  |  |  |  |  |  |  |  |  |  |  |  |  |  |  |  |  |  |  |  |  |  |  |  |  |  |  |  |  |  |  |  |  |  |  |  |  |  |  |  |  |  |  |  |  |  |  |  |  |  |  |  |  |  |  |  |  |  |  |  |  |  |  |  |  |  |  |  |  |  |  |  |  |  |  |  |  |  |  |  |  |  |  |  |  |  |  |  |  |  |  |  |  |  |  |  |  |  |  |  |  |  |  |  |  |  |  |  |  |  |  |  |  |  |  |  |  |  |  |  |  |  |  |  |  |  |  |  |  |  |  |  |  |  |  |  |  |  |  |  |  |  |  |  |  |  |  |  |  |  |  |  |  |  |  |  |  |  |  |  |  |  |  |  |  |  |  |  |  |  |  |  |  |  |  |  |  |  |  |  |  |  |  |  |  |  |  |  |  |  |  |  |  |  |  |  |  |  |  |  |  |  |  |  |  |  |  |  |  |  |  |  |  |  |  |  |  |  |  |  |  |  |  |  |  |  |  |  |  |  |  |  |  |  |  |  |  |  |  |  |  |  |  |  |  |  |  |  |  |  |  |  |  |  |  |  |  |  |  |  |  |  |  |  |  |  |  |  |  |  |  |  |  |  |  |  |  |  |  |  |  |  |  |  |  |  |  |  |  |  |  |  |  |  |  |  |  |  |  |  |  |  |  |  |  |  |  |  |  |  |  |  |  |  |  |  |  |  |  |  |  |  |  |  |  |  |  |  |  |  |  |  |  |  |  |  |  |  |  |  |  |  |  |  |  |  |  |  |  |  |  |  |  |  |  |  |  |  |  |  |  |  |  |  |  |  |  |  |  |  |  |  |  |  |  |  |  |  |  |  |  |  |  |  |  |  |  |  |  |  |  |  |  |  |  |  |  |  |  |  |  |  |  |  |  |  |  |  |  |  |  |  |  |  |  |  |  |  |  |  |  |  |  |  |  |  |  |  |  |  |  |  |  |  |  |  |  |  |  |  |  |  |  |  |  |  |  |  |  |  |  |  |  |  |  |  |  |  |  |  |  |  |  |  |  |  |  |  |  |  |  |  |  |  |  |  |  |  |  |  |  |
|--|--|--|--|--|--|-----------------------------------------------------------------------------------------------------|--|--|--|--|--|--|--|--|--|-------------------------------------------------------------------------------------------------------------------------------------------------------------------------------------------|--|--|--|--|--|--|--|--|--|--|--|--|--|--|--|--|--|--|--|--|--|--|--|--|--|--|--|--|--|--|--|--|--|--|--|--|--|--|--|--|--|--|--|--|--|--|--|--|--|--|--|--|--|--|--|--|--|--|--|--|--|--|--|--|--|--|--|--|--|--|--|--|--|--|--|--|--|--|--|--|--|--|--|--|--|--|--|--|--|--|--|--|--|--|--|--|--|--|--|--|--|--|--|--|--|--|--|--|--|--|--|--|--|--|--|--|--|--|--|--|--|--|--|--|--|--|--|--|--|--|--|--|--|--|--|--|--|--|--|--|--|--|--|--|--|--|--|--|--|--|--|--|--|--|--|--|--|--|--|--|--|--|--|--|--|--|--|--|--|--|--|--|--|--|--|--|--|--|--|--|--|--|--|--|--|--|--|--|--|--|--|--|--|--|--|--|--|--|--|--|--|--|--|--|--|--|--|--|--|--|--|--|--|--|--|--|--|--|--|--|--|--|--|--|--|--|--|--|--|--|--|--|--|--|--|--|--|--|--|--|--|--|--|--|--|--|--|--|--|--|--|--|--|--|--|--|--|--|--|--|--|--|--|--|--|--|--|--|--|--|--|--|--|--|--|--|--|--|--|--|--|--|--|--|--|--|--|--|--|--|--|--|--|--|--|--|--|--|--|--|--|--|--|--|--|--|--|--|--|--|--|--|--|--|--|--|--|--|--|--|--|--|--|--|--|--|--|--|--|--|--|--|--|--|--|--|--|--|--|--|--|--|--|--|--|--|--|--|--|--|--|--|--|--|--|--|--|--|--|--|--|--|--|--|--|--|--|--|--|--|--|--|--|--|--|--|--|--|--|--|--|--|--|--|--|--|--|--|--|--|--|--|--|--|--|--|--|--|--|--|--|--|--|--|--|--|--|--|--|--|--|--|--|--|--|--|--|--|--|--|--|--|--|--|--|--|--|--|--|--|--|--|--|--|--|--|--|--|--|--|--|--|--|--|--|--|--|--|--|--|--|--|--|--|--|--|--|--|--|--|--|--|--|--|--|--|--|--|--|--|--|--|--|--|--|--|--|--|--|--|--|--|--|--|--|--|--|--|--|--|--|--|--|--|--|--|--|--|--|--|--|--|--|--|--|--|--|--|--|--|--|--|--|--|--|--|--|--|--|--|--|--|--|--|--|--|--|--|--|--|--|--|--|--|--|--|--|--|--|--|--|--|--|--|--|--|--|--|--|--|--|--|--|--|--|--|--|--|--|--|--|--|--|--|--|--|--|--|--|--|--|--|--|--|--|--|--|--|--|--|--|--|--|--|--|--|--|--|--|--|--|--|--|--|--|--|--|--|--|--|--|--|--|--|--|--|--|--|--|--|--|--|--|--|--|--|--|--|--|--|--|--|--|--|--|--|--|--|--|--|--|--|--|--|--|--|--|--|--|--|--|--|--|--|--|--|--|--|--|--|--|--|--|--|--|--|--|--|--|--|--|--|--|--|--|--|--|--|--|--|--|--|--|--|--|--|--|--|--|--|--|--|--|--|--|--|--|--|--|--|--|--|--|--|--|--|--|--|--|--|--|--|--|--|--|--|--|--|--|--|--|--|--|--|--|--|--|--|--|--|--|--|--|--|--|--|--|--|--|--|--|--|--|--|--|--|--|--|--|--|--|--|--|--|--|--|--|--|--|--|--|--|--|--|--|--|--|--|--|--|--|--|--|--|--|--|--|--|--|--|--|--|--|--|--|--|--|--|--|--|--|--|--|--|--|--|--|--|--|--|--|--|--|--|--|--|--|--|--|--|--|--|--|--|--|--|--|--|--|--|--|--|--|--|--|--|--|--|--|--|--|--|--|--|--|--|--|--|--|--|--|--|--|--|--|--|--|--|--|--|--|--|--|--|--|--|--|--|--|--|--|--|--|--|--|--|--|--|--|--|--|--|--|--|--|--|--|--|--|--|--|--|--|--|--|--|--|--|--|--|--|--|--|--|--|--|--|--|--|--|--|--|--|--|--|--|--|--|--|--|--|--|--|--|--|--|--|--|--|--|--|--|--|--|--|--|--|--|--|--|--|--|--|--|--|--|--|--|--|--|--|--|--|--|--|--|--|--|--|--|--|--|--|--|--|--|--|--|--|--|--|--|--|--|--|--|--|--|--|--|--|--|--|--|--|--|--|--|--|--|--|--|--|--|--|--|--|--|--|--|--|--|--|--|--|--|--|--|--|--|--|--|--|--|--|--|--|--|--|--|--|--|--|--|--|--|--|--|--|--|--|--|--|--|--|--|--|--|--|--|--|--|--|--|--|--|--|--|--|--|--|--|--|--|--|--|--|--|--|--|--|--|--|--|--|--|--|--|--|--|--|--|--|--|--|--|--|--|--|--|--|--|--|--|--|--|--|--|--|--|--|--|--|--|--|--|--|--|--|--|--|--|--|--|--|--|--|--|--|--|--|--|--|--|--|--|--|--|--|--|--|--|--|--|--|--|--|--|--|--|--|--|--|--|--|--|--|--|--|--|--|--|--|--|--|--|--|--|--|--|--|--|--|--|--|--|--|--|--|--|--|--|--|--|--|--|--|--|--|--|--|--|--|--|--|--|--|--|--|--|--|--|--|--|--|--|--|--|--|--|--|--|--|--|--|--|--|--|--|--|--|--|--|--|--|--|--|--|--|--|--|--|--|--|--|--|--|--|--|--|--|--|--|--|--|--|--|--|--|--|--|--|--|--|--|--|--|--|--|--|--|--|--|--|--|--|--|--|--|--|--|--|--|--|--|--|--|--|--|--|--|--|--|--|--|--|--|--|--|--|--|--|--|--|--|--|--|--|--|--|--|--|--|--|--|--|--|--|--|--|--|--|--|--|--|--|--|--|--|--|--|--|--|--|--|--|--|--|--|--|--|--|--|--|--|--|--|--|--|--|--|--|--|--|--|--|--|--|--|--|--|--|--|--|--|--|--|--|--|--|--|--|--|--|--|--|--|--|--|--|--|--|--|--|--|--|--|--|--|--|--|--|--|--|--|--|--|--|--|--|--|--|--|--|--|--|--|--|--|--|--|--|--|--|--|--|--|--|--|--|--|--|--|--|--|--|--|--|--|--|--|--|--|--|--|--|--|--|--|--|--|--|--|--|--|--|--|--|--|--|--|--|--|--|--|--|--|--|--|--|--|--|--|--|--|--|--|--|--|--|--|--|--|--|--|--|--|--|--|--|--|--|--|--|--|--|--|--|--|--|--|--|--|--|--|--|--|--|--|--|--|--|--|--|--|--|--|--|--|--|--|--|--|--|--|--|--|--|--|--|--|--|--|--|--|

<sup>17</sup> OR for linear trend  
<sup>18</sup> Considered as a cross-sectional analysis

[illegible]





|                                                                                                                                                                                                                                                                                                                                                                                                                                                          |                              |                                                         |           |    |              |                                                                                                                                                                                                            |    |                   |           |     |       |   |                                           |                                                                                                                                      |                                                                                                                                                                                                                                                                                                                                                                                                                                                                                                                                                                                                                                                              |    |          |     |    |     |     |                                            |                           |              |                                                                                                                                                                                                                                                                                                                                                                                                                                                                                                                                                                                                                                      |
|----------------------------------------------------------------------------------------------------------------------------------------------------------------------------------------------------------------------------------------------------------------------------------------------------------------------------------------------------------------------------------------------------------------------------------------------------------|------------------------------|---------------------------------------------------------|-----------|----|--------------|------------------------------------------------------------------------------------------------------------------------------------------------------------------------------------------------------------|----|-------------------|-----------|-----|-------|---|-------------------------------------------|--------------------------------------------------------------------------------------------------------------------------------------|--------------------------------------------------------------------------------------------------------------------------------------------------------------------------------------------------------------------------------------------------------------------------------------------------------------------------------------------------------------------------------------------------------------------------------------------------------------------------------------------------------------------------------------------------------------------------------------------------------------------------------------------------------------|----|----------|-----|----|-----|-----|--------------------------------------------|---------------------------|--------------|--------------------------------------------------------------------------------------------------------------------------------------------------------------------------------------------------------------------------------------------------------------------------------------------------------------------------------------------------------------------------------------------------------------------------------------------------------------------------------------------------------------------------------------------------------------------------------------------------------------------------------------|
|                                                                                                                                                                                                                                                                                                                                                                                                                                                          |                              |                                                         |           |    |              |                                                                                                                                                                                                            |    |                   |           |     |       |   |                                           |                                                                                                                                      |                                                                                                                                                                                                                                                                                                                                                                                                                                                                                                                                                                                                                                                              | No | 32<br>39 |     |    |     |     |                                            | 2.67*(1.13, 6.51)<br>1.00 |              |                                                                                                                                                                                                                                                                                                                                                                                                                                                                                                                                                                                                                                      |
| Leprosy was associated with migration in the past five years. Among migrants, having a leprosy contact, lower income, poor public waste services, alcohol consumption and illiteracy in the family were associated with leprosy. However, education, zone of residence and lifestyle stressors were not associated with leprosy.                                                                                                                         |                              |                                                         |           |    |              |                                                                                                                                                                                                            |    |                   |           |     |       |   |                                           |                                                                                                                                      |                                                                                                                                                                                                                                                                                                                                                                                                                                                                                                                                                                                                                                                              |    |          |     |    |     |     |                                            |                           |              |                                                                                                                                                                                                                                                                                                                                                                                                                                                                                                                                                                                                                                      |
| (46)                                                                                                                                                                                                                                                                                                                                                                                                                                                     | Barreto JC et al, 2014       | Brazil (Castanhal municipality)                         | 2004-2010 | EC | Census tract | Spatial analysis techniques were used to determine the spatio-temporal pattern of leprosy cases in eleven districts from a hyperendemic municipality in the Brazilian Amazon region.                       | PB | 114 census tracts | All ages  | URB | 499   | I | 25.1-97.0 / 100,000                       |                                                                                                                                      | Mean number of people per household (household density)                                                                                                                                                                                                                                                                                                                                                                                                                                                                                                                                                                                                      |    | 5.0      | 2.6 |    | 3.8 | 3.2 | Mann-Whitney test                          | U                         | NA (p<0.001) |                                                                                                                                                                                                                                                                                                                                                                                                                                                                                                                                                                                                                                      |
| A positive correlation was found between household density and leprosy incidence. Spatial clusters of high and low detection rates were also found, as well as a spatial autocorrelation of individual cases at fine spatio-temporal scales.                                                                                                                                                                                                             |                              |                                                         |           |    |              |                                                                                                                                                                                                            |    |                   |           |     |       |   |                                           |                                                                                                                                      |                                                                                                                                                                                                                                                                                                                                                                                                                                                                                                                                                                                                                                                              |    |          |     |    |     |     |                                            |                           |              |                                                                                                                                                                                                                                                                                                                                                                                                                                                                                                                                                                                                                                      |
| (47)                                                                                                                                                                                                                                                                                                                                                                                                                                                     | Cabral-Miranda W et al, 2014 | Brazil (State of Bahia), the all of 417 municipalities) | 2005-2011 | EC | Municipality | Study of new cases of leprosy that occurred between 2005 and 2011 in the all of 417 municipalities in the State, in children under 15 years old. A hierarchical conceptual model in three levels was used. | PB | 417               | <15 years | MX  | 1,674 | I | 0.88/10,000 (2005),<br>0.52/10,000 (2011) | 'Caatinga', % of water bodies, Gini Index, average No. of dwellers p/ residence, % of urban population, % of residents born in Bahia | OLS regression<br>'Caatinga' (No vs Yes)<br>Percent of water bodies<br>Gini Index<br>Average No. of dwellers /residence<br>Percent of urban population<br>Percent of resident born in Bahia<br><br>Spatial regression<br>'Caatinga' (No vs Yes)<br>Percent of water bodies<br>Gini Index<br>Average No. of dwellers /residence<br>Percent of urban population<br>Percent of resident born in Bahia<br><br>Spatial components in spatial regression<br>Lag of 'caatinga' (No vs Yes)<br>Lag of % of water bodies<br>Lag of Gini Index<br><br>Lag of average No. of dwellers / residence<br>Lag of % of urban population<br>Lag of % of resident born in Bahia |    | NA       | NA  | NA | NA  | NA  | LR (OLS regression and spatial regression) | RR                        |              | -0.00 (0.41) <sup>21</sup><br>0.04 (0.02) <sup>21</sup><br>3.84 (0.00) <sup>21</sup><br>0.43 (0.04) <sup>21</sup><br><br>0.02 (<0.00) <sup>21</sup><br>-0.04 (0.00) <sup>21</sup><br><br><br><br>-1.11e-03 (0.32) <sup>22</sup><br>3.85e-02 (0.05) <sup>22</sup><br>3.36e+00 (0.00) <sup>22</sup><br>1.22e-01 (0.63) <sup>22</sup><br><br>1.71e-02 (0.00) <sup>22</sup><br>-2.28e-05 (0.99) <sup>22</sup><br><br><br><br>1.29e-03 (0.41) <sup>23</sup><br><br>-2.24e-02 (0.52) <sup>23</sup><br>1.47e+00 (0.40) <sup>23</sup><br>8.63e-01 (0.04) <sup>23</sup><br><br>3.13e-03 (0.51) <sup>23</sup><br>5.94e-02 (0.00) <sup>23</sup> |
| In the regression model, after allowing for spatial dependence, relative risk of leprosy in children less than 15 years old was associated with higher percentage of area occupied by water bodies, greater Gini index and higher percentage of urban population; additional explanation was given, considering the spatial components, by a larger average number of dwellers by permanent residence and a lower percentage of residents born in Bahia. |                              |                                                         |           |    |              |                                                                                                                                                                                                            |    |                   |           |     |       |   |                                           |                                                                                                                                      |                                                                                                                                                                                                                                                                                                                                                                                                                                                                                                                                                                                                                                                              |    |          |     |    |     |     |                                            |                           |              |                                                                                                                                                                                                                                                                                                                                                                                                                                                                                                                                                                                                                                      |

<sup>21</sup> OLS (ordinary least squares) regression estimate (Pr(|z|)

<sup>22</sup> Spatial regression estimate (Pr(|z|)

<sup>23</sup> Spatial component estimate (Pr(|z|)

[illegible]

|  |  |  |  |  |  |  |  |  |  |  |  |  |  |                      |                                                                                                                                            |  |  |  |  |  |  |  |  |  |  |  |  |  |  |  |  |  |  |  |  |  |  |  |  |  |  |  |  |  |  |  |  |  |  |  |  |  |  |  |  |  |  |  |  |  |  |  |  |  |  |  |  |  |  |  |  |  |  |  |  |  |  |  |  |  |  |  |  |  |  |  |  |  |  |  |  |  |  |  |  |  |  |  |  |  |  |  |  |  |  |  |  |  |  |  |  |  |  |  |  |  |  |  |  |  |  |  |  |  |  |  |  |  |  |  |  |  |  |  |  |  |  |  |  |  |  |  |  |  |  |  |  |  |  |  |  |  |  |  |  |  |  |  |  |  |  |  |  |  |  |  |  |  |  |  |  |  |  |  |  |  |  |  |  |  |  |  |  |  |  |  |  |  |  |  |  |  |  |  |  |  |  |  |  |  |  |  |  |  |  |  |  |  |  |  |  |  |  |  |  |  |  |  |  |  |  |  |  |  |  |  |  |  |  |  |  |  |  |  |  |  |  |  |  |  |  |  |  |  |  |  |  |  |  |  |  |  |  |  |  |  |  |  |  |  |  |  |  |  |  |  |  |  |  |  |  |  |  |  |  |  |  |  |  |  |  |  |  |  |  |  |  |  |  |  |  |  |  |  |  |  |  |  |  |  |  |  |  |  |  |  |  |  |  |  |  |  |  |  |  |  |  |  |  |  |  |  |  |  |  |  |  |  |  |  |  |  |  |  |  |  |  |  |  |  |  |  |  |  |  |  |  |  |  |  |  |  |  |  |  |  |  |  |  |  |  |  |  |  |  |  |  |  |  |  |  |  |  |  |  |  |  |  |  |  |  |  |  |  |  |  |  |  |  |  |  |  |  |  |  |  |  |  |  |  |  |  |  |  |  |  |  |  |  |  |  |  |  |  |  |  |  |  |  |  |  |  |  |  |  |  |  |  |  |  |  |  |  |  |  |  |  |  |  |  |  |  |  |  |  |  |  |  |  |  |  |  |  |  |  |  |  |  |  |  |  |  |  |  |  |  |  |  |  |  |  |  |  |  |  |  |  |  |  |  |  |  |  |  |  |  |  |  |  |  |  |  |  |  |  |  |  |  |  |  |  |  |  |  |  |  |  |  |  |  |  |  |  |  |  |  |  |  |  |  |  |  |  |  |  |  |  |  |  |  |  |  |  |  |  |  |  |  |  |  |  |  |  |  |  |  |  |  |  |  |  |  |  |  |  |  |  |  |  |  |  |  |  |  |  |  |  |  |  |  |  |  |  |  |  |  |  |  |  |  |  |  |  |  |  |  |  |  |  |  |  |  |  |  |  |  |  |  |  |  |  |  |  |  |  |  |  |  |  |  |  |  |  |  |  |  |  |  |  |  |  |  |  |  |  |  |  |  |  |  |  |  |  |  |  |  |  |  |  |  |  |  |  |  |  |  |  |  |  |  |  |  |  |  |  |  |  |  |  |  |  |  |  |  |  |  |  |  |  |  |  |  |  |  |  |  |  |  |  |  |  |  |  |  |  |  |  |  |  |  |  |  |  |  |  |  |  |  |  |  |  |  |  |  |  |  |  |  |  |  |  |  |  |  |  |  |  |  |  |  |  |  |  |  |  |  |  |  |  |  |  |  |  |  |  |  |  |  |  |  |  |  |  |  |  |  |  |  |  |  |  |  |  |  |  |  |  |  |  |  |  |  |  |  |  |  |  |  |  |  |  |  |  |  |  |  |  |  |  |  |  |  |  |  |  |  |  |  |  |  |  |  |  |  |  |  |  |  |  |  |  |  |  |  |  |  |  |  |  |  |  |  |  |  |  |  |  |  |  |  |  |  |  |  |  |  |  |  |  |  |  |  |  |  |  |  |  |  |  |  |  |  |  |  |  |  |  |  |  |  |  |  |  |  |  |  |  |  |  |  |  |  |  |  |  |  |  |  |  |  |  |  |  |  |  |  |  |  |  |  |  |  |  |  |  |  |  |  |  |  |  |  |  |  |  |  |  |  |  |  |  |  |  |  |  |  |  |  |  |  |  |  |  |  |  |  |  |  |  |  |  |  |  |  |  |  |  |  |  |  |  |  |  |  |  |  |  |  |  |  |  |  |  |  |  |  |  |  |  |  |  |  |  |  |  |  |  |  |  |  |  |  |  |  |  |  |  |  |  |  |  |  |  |  |  |  |  |  |  |  |  |  |  |  |  |  |  |  |  |  |  |  |  |  |  |  |  |  |  |  |  |  |  |  |  |  |  |  |  |  |  |  |  |  |  |  |  |  |  |  |  |  |  |  |  |  |  |  |  |  |  |  |  |  |  |  |  |  |  |  |  |  |  |  |  |  |  |  |  |  |  |  |  |  |  |  |  |  |  |  |  |  |  |  |  |  |  |  |  |  |  |  |  |  |  |  |  |  |  |  |  |  |  |  |  |  |  |  |  |  |  |  |  |  |  |  |  |  |  |  |  |  |  |  |  |  |  |  |  |  |  |  |  |  |  |  |  |  |  |  |  |  |  |  |  |  |  |  |  |  |  |  |  |  |  |  |  |  |  |  |  |  |  |  |  |  |  |  |  |  |  |  |  |  |  |  |  |  |  |  |  |  |  |  |  |  |  |  |  |  |  |  |  |  |  |  |  |  |  |  |  |  |  |  |  |  |  |  |  |  |  |  |  |  |  |  |  |  |  |  |  |  |  |  |  |  |  |  |  |  |  |  |  |  |  |  |  |  |  |  |  |  |  |  |  |  |  |  |  |  |  |  |  |  |  |  |  |  |  |  |  |  |  |  |  |  |  |  |  |  |  |  |  |  |  |  |  |  |  |  |  |  |  |  |  |  |  |  |  |  |  |  |  |  |  |  |  |  |  |  |  |  |  |  |  |  |  |  |  |  |  |  |  |  |  |  |  |  |  |  |  |  |  |  |  |  |  |  |  |  |  |  |  |  |  |  |  |  |  |  |  |  |  |  |  |  |  |  |  |  |  |  |  |  |  |  |  |  |  |  |  |  |  |  |  |  |  |  |  |  |  |  |  |  |  |  |  |  |  |  |  |  |  |  |  |  |  |  |  |  |  |  |  |  |  |  |  |  |  |  |  |  |  |  |  |  |  |  |  |  |  |  |  |  |  |  |  |  |  |  |  |  |  |  |  |  |  |  |  |  |  |  |  |  |  |  |  |  |  |  |  |  |  |  |  |  |  |  |  |  |  |  |  |  |  |  |  |  |  |  |  |  |  |  |  |  |  |  |  |  |  |  |  |  |  |  |  |  |  |  |  |  |  |  |  |  |  |  |  |  |  |  |  |  |  |  |  |  |  |  |  |  |  |  |  |  |  |    |
|--|--|--|--|--|--|--|--|--|--|--|--|--|--|----------------------|--------------------------------------------------------------------------------------------------------------------------------------------|--|--|--|--|--|--|--|--|--|--|--|--|--|--|--|--|--|--|--|--|--|--|--|--|--|--|--|--|--|--|--|--|--|--|--|--|--|--|--|--|--|--|--|--|--|--|--|--|--|--|--|--|--|--|--|--|--|--|--|--|--|--|--|--|--|--|--|--|--|--|--|--|--|--|--|--|--|--|--|--|--|--|--|--|--|--|--|--|--|--|--|--|--|--|--|--|--|--|--|--|--|--|--|--|--|--|--|--|--|--|--|--|--|--|--|--|--|--|--|--|--|--|--|--|--|--|--|--|--|--|--|--|--|--|--|--|--|--|--|--|--|--|--|--|--|--|--|--|--|--|--|--|--|--|--|--|--|--|--|--|--|--|--|--|--|--|--|--|--|--|--|--|--|--|--|--|--|--|--|--|--|--|--|--|--|--|--|--|--|--|--|--|--|--|--|--|--|--|--|--|--|--|--|--|--|--|--|--|--|--|--|--|--|--|--|--|--|--|--|--|--|--|--|--|--|--|--|--|--|--|--|--|--|--|--|--|--|--|--|--|--|--|--|--|--|--|--|--|--|--|--|--|--|--|--|--|--|--|--|--|--|--|--|--|--|--|--|--|--|--|--|--|--|--|--|--|--|--|--|--|--|--|--|--|--|--|--|--|--|--|--|--|--|--|--|--|--|--|--|--|--|--|--|--|--|--|--|--|--|--|--|--|--|--|--|--|--|--|--|--|--|--|--|--|--|--|--|--|--|--|--|--|--|--|--|--|--|--|--|--|--|--|--|--|--|--|--|--|--|--|--|--|--|--|--|--|--|--|--|--|--|--|--|--|--|--|--|--|--|--|--|--|--|--|--|--|--|--|--|--|--|--|--|--|--|--|--|--|--|--|--|--|--|--|--|--|--|--|--|--|--|--|--|--|--|--|--|--|--|--|--|--|--|--|--|--|--|--|--|--|--|--|--|--|--|--|--|--|--|--|--|--|--|--|--|--|--|--|--|--|--|--|--|--|--|--|--|--|--|--|--|--|--|--|--|--|--|--|--|--|--|--|--|--|--|--|--|--|--|--|--|--|--|--|--|--|--|--|--|--|--|--|--|--|--|--|--|--|--|--|--|--|--|--|--|--|--|--|--|--|--|--|--|--|--|--|--|--|--|--|--|--|--|--|--|--|--|--|--|--|--|--|--|--|--|--|--|--|--|--|--|--|--|--|--|--|--|--|--|--|--|--|--|--|--|--|--|--|--|--|--|--|--|--|--|--|--|--|--|--|--|--|--|--|--|--|--|--|--|--|--|--|--|--|--|--|--|--|--|--|--|--|--|--|--|--|--|--|--|--|--|--|--|--|--|--|--|--|--|--|--|--|--|--|--|--|--|--|--|--|--|--|--|--|--|--|--|--|--|--|--|--|--|--|--|--|--|--|--|--|--|--|--|--|--|--|--|--|--|--|--|--|--|--|--|--|--|--|--|--|--|--|--|--|--|--|--|--|--|--|--|--|--|--|--|--|--|--|--|--|--|--|--|--|--|--|--|--|--|--|--|--|--|--|--|--|--|--|--|--|--|--|--|--|--|--|--|--|--|--|--|--|--|--|--|--|--|--|--|--|--|--|--|--|--|--|--|--|--|--|--|--|--|--|--|--|--|--|--|--|--|--|--|--|--|--|--|--|--|--|--|--|--|--|--|--|--|--|--|--|--|--|--|--|--|--|--|--|--|--|--|--|--|--|--|--|--|--|--|--|--|--|--|--|--|--|--|--|--|--|--|--|--|--|--|--|--|--|--|--|--|--|--|--|--|--|--|--|--|--|--|--|--|--|--|--|--|--|--|--|--|--|--|--|--|--|--|--|--|--|--|--|--|--|--|--|--|--|--|--|--|--|--|--|--|--|--|--|--|--|--|--|--|--|--|--|--|--|--|--|--|--|--|--|--|--|--|--|--|--|--|--|--|--|--|--|--|--|--|--|--|--|--|--|--|--|--|--|--|--|--|--|--|--|--|--|--|--|--|--|--|--|--|--|--|--|--|--|--|--|--|--|--|--|--|--|--|--|--|--|--|--|--|--|--|--|--|--|--|--|--|--|--|--|--|--|--|--|--|--|--|--|--|--|--|--|--|--|--|--|--|--|--|--|--|--|--|--|--|--|--|--|--|--|--|--|--|--|--|--|--|--|--|--|--|--|--|--|--|--|--|--|--|--|--|--|--|--|--|--|--|--|--|--|--|--|--|--|--|--|--|--|--|--|--|--|--|--|--|--|--|--|--|--|--|--|--|--|--|--|--|--|--|--|--|--|--|--|--|--|--|--|--|--|--|--|--|--|--|--|--|--|--|--|--|--|--|--|--|--|--|--|--|--|--|--|--|--|--|--|--|--|--|--|--|--|--|--|--|--|--|--|--|--|--|--|--|--|--|--|--|--|--|--|--|--|--|--|--|--|--|--|--|--|--|--|--|--|--|--|--|--|--|--|--|--|--|--|--|--|--|--|--|--|--|--|--|--|--|--|--|--|--|--|--|--|--|--|--|--|--|--|--|--|--|--|--|--|--|--|--|--|--|--|--|--|--|--|--|--|--|--|--|--|--|--|--|--|--|--|--|--|--|--|--|--|--|--|--|--|--|--|--|--|--|--|--|--|--|--|--|--|--|--|--|--|--|--|--|--|--|--|--|--|--|--|--|--|--|--|--|--|--|--|--|--|--|--|--|--|--|--|--|--|--|--|--|--|--|--|--|--|--|--|--|--|--|--|--|--|--|--|--|--|--|--|--|--|--|--|--|--|--|--|--|--|--|--|--|--|--|--|--|--|--|--|--|--|--|--|--|--|--|--|--|--|--|--|--|--|--|--|--|--|--|--|--|--|--|--|--|--|--|--|--|--|--|--|--|--|--|--|--|--|--|--|--|--|--|--|--|--|--|--|--|--|--|--|--|--|--|--|--|--|--|--|--|--|--|--|--|--|--|--|--|--|--|--|--|--|--|--|--|--|--|--|--|--|--|--|--|--|--|--|--|--|--|--|--|--|--|--|--|--|--|--|--|--|--|--|--|--|--|--|--|--|--|--|--|--|--|--|--|--|--|--|--|--|--|--|--|--|--|--|--|--|--|--|--|--|--|--|--|--|--|--|--|--|--|--|--|--|--|--|--|--|--|--|--|--|--|--|--|--|--|--|--|--|--|--|--|--|--|--|--|--|--|--|--|--|--|--|--|--|--|--|--|--|--|--|--|--|--|--|--|--|--|--|--|--|--|--|--|--|--|--|--|--|--|--|--|--|--|--|--|--|--|--|--|--|--|--|--|--|--|--|--|--|--|--|--|--|----|
|  |  |  |  |  |  |  |  |  |  |  |  |  |  | (20–20) income ratio | ≥8<br><12<br>≥12 to <17<br>≥17 to <27<br>≥27<br>Percentage of coverage of the Family Allowance Programme (PBF)<br><16<br>≥16 to <30<br>≥30 |  |  |  |  |  |  |  |  |  |  |  |  |  |  |  |  |  |  |  |  |  |  |  |  |  |  |  |  |  |  |  |  |  |  |  |  |  |  |  |  |  |  |  |  |  |  |  |  |  |  |  |  |  |  |  |  |  |  |  |  |  |  |  |  |  |  |  |  |  |  |  |  |  |  |  |  |  |  |  |  |  |  |  |  |  |  |  |  |  |  |  |  |  |  |  |  |  |  |  |  |  |  |  |  |  |  |  |  |  |  |  |  |  |  |  |  |  |  |  |  |  |  |  |  |  |  |  |  |  |  |  |  |  |  |  |  |  |  |  |  |  |  |  |  |  |  |  |  |  |  |  |  |  |  |  |  |  |  |  |  |  |  |  |  |  |  |  |  |  |  |  |  |  |  |  |  |  |  |  |  |  |  |  |  |  |  |  |  |  |  |  |  |  |  |  |  |  |  |  |  |  |  |  |  |  |  |  |  |  |  |  |  |  |  |  |  |  |  |  |  |  |  |  |  |  |  |  |  |  |  |  |  |  |  |  |  |  |  |  |  |  |  |  |  |  |  |  |  |  |  |  |  |  |  |  |  |  |  |  |  |  |  |  |  |  |  |  |  |  |  |  |  |  |  |  |  |  |  |  |  |  |  |  |  |  |  |  |  |  |  |  |  |  |  |  |  |  |  |  |  |  |  |  |  |  |  |  |  |  |  |  |  |  |  |  |  |  |  |  |  |  |  |  |  |  |  |  |  |  |  |  |  |  |  |  |  |  |  |  |  |  |  |  |  |  |  |  |  |  |  |  |  |  |  |  |  |  |  |  |  |  |  |  |  |  |  |  |  |  |  |  |  |  |  |  |  |  |  |  |  |  |  |  |  |  |  |  |  |  |  |  |  |  |  |  |  |  |  |  |  |  |  |  |  |  |  |  |  |  |  |  |  |  |  |  |  |  |  |  |  |  |  |  |  |  |  |  |  |  |  |  |  |  |  |  |  |  |  |  |  |  |  |  |  |  |  |  |  |  |  |  |  |  |  |  |  |  |  |  |  |  |  |  |  |  |  |  |  |  |  |  |  |  |  |  |  |  |  |  |  |  |  |  |  |  |  |  |  |  |  |  |  |  |  |  |  |  |  |  |  |  |  |  |  |  |  |  |  |  |  |  |  |  |  |  |  |  |  |  |  |  |  |  |  |  |  |  |  |  |  |  |  |  |  |  |  |  |  |  |  |  |  |  |  |  |  |  |  |  |  |  |  |  |  |  |  |  |  |  |  |  |  |  |  |  |  |  |  |  |  |  |  |  |  |  |  |  |  |  |  |  |  |  |  |  |  |  |  |  |  |  |  |  |  |  |  |  |  |  |  |  |  |  |  |  |  |  |  |  |  |  |  |  |  |  |  |  |  |  |  |  |  |  |  |  |  |  |  |  |  |  |  |  |  |  |  |  |  |  |  |  |  |  |  |  |  |  |  |  |  |  |  |  |  |  |  |  |  |  |  |  |  |  |  |  |  |  |  |  |  |  |  |  |  |  |  |  |  |  |  |  |  |  |  |  |  |  |  |  |  |  |  |  |  |  |  |  |  |  |  |  |  |  |  |  |  |  |  |  |  |  |  |  |  |  |  |  |  |  |  |  |  |  |  |  |  |  |  |  |  |  |  |  |  |  |  |  |  |  |  |  |  |  |  |  |  |  |  |  |  |  |  |  |  |  |  |  |  |  |  |  |  |  |  |  |  |  |  |  |  |  |  |  |  |  |  |  |  |  |  |  |  |  |  |  |  |  |  |  |  |  |  |  |  |  |  |  |  |  |  |  |  |  |  |  |  |  |  |  |  |  |  |  |  |  |  |  |  |  |  |  |  |  |  |  |  |  |  |  |  |  |  |  |  |  |  |  |  |  |  |  |  |  |  |  |  |  |  |  |  |  |  |  |  |  |  |  |  |  |  |  |  |  |  |  |  |  |  |  |  |  |  |  |  |  |  |  |  |  |  |  |  |  |  |  |  |  |  |  |  |  |  |  |  |  |  |  |  |  |  |  |  |  |  |  |  |  |  |  |  |  |  |  |  |  |  |  |  |  |  |  |  |  |  |  |  |  |  |  |  |  |  |  |  |  |  |  |  |  |  |  |  |  |  |  |  |  |  |  |  |  |  |  |  |  |  |  |  |  |  |  |  |  |  |  |  |  |  |  |  |  |  |  |  |  |  |  |  |  |  |  |  |  |  |  |  |  |  |  |  |  |  |  |  |  |  |  |  |  |  |  |  |  |  |  |  |  |  |  |  |  |  |  |  |  |  |  |  |  |  |  |  |  |  |  |  |  |  |  |  |  |  |  |  |  |  |  |  |  |  |  |  |  |  |  |  |  |  |  |  |  |  |  |  |  |  |  |  |  |  |  |  |  |  |  |  |  |  |  |  |  |  |  |  |  |  |  |  |  |  |  |  |  |  |  |  |  |  |  |  |  |  |  |  |  |  |  |  |  |  |  |  |  |  |  |  |  |  |  |  |  |  |  |  |  |  |  |  |  |  |  |  |  |  |  |  |  |  |  |  |  |  |  |  |  |  |  |  |  |  |  |  |  |  |  |  |  |  |  |  |  |  |  |  |  |  |  |  |  |  |  |  |  |  |  |  |  |  |  |  |  |  |  |  |  |  |  |  |  |  |  |  |  |  |  |  |  |  |  |  |  |  |  |  |  |  |  |  |  |  |  |  |  |  |  |  |  |  |  |  |  |  |  |  |  |  |  |  |  |  |  |  |  |  |  |  |  |  |  |  |  |  |  |  |  |  |  |  |  |  |  |  |  |  |  |  |  |  |  |  |  |  |  |  |  |  |  |  |  |  |  |  |  |  |  |  |  |  |  |  |  |  |  |  |  |  |  |  |  |  |  |  |  |  |  |  |  |  |  |  |  |  |  |  |  |  |  |  |  |  |  |  |  |  |  |  |  |  |  |  |  |  |  |  |  |  |  |  |  |  |  |  |  |  |  |  |  |  |  |  |  |  |  |  |  |  |  |  |  |  |  |  |  |  |  |  |  |  |  |  |  |  |  |  |  |  |  |  |  |  |  |  |  |  |  |  |  |  |  |  |  |  |  |  |  |  |  |  |  |  |  |  |  |  |  |  |  |  |  |  |  |  |  |  |  |  |  |  |  |  |  |  |  |  |  |  |  |  |  |  |  |  |  |  |  |  |  |  |  |  |  |  |  |  |  |  |  |  |  |  |  |  |  |  |  |  |  |  |  |  |  |  |  |  |  |  |  |  |  |  |  |  |  |  |  |  |  |  |  |  |  |  |  |  |  |  |  |  |  |  |  |  | </ |
|--|--|--|--|--|--|--|--|--|--|--|--|--|--|----------------------|--------------------------------------------------------------------------------------------------------------------------------------------|--|--|--|--|--|--|--|--|--|--|--|--|--|--|--|--|--|--|--|--|--|--|--|--|--|--|--|--|--|--|--|--|--|--|--|--|--|--|--|--|--|--|--|--|--|--|--|--|--|--|--|--|--|--|--|--|--|--|--|--|--|--|--|--|--|--|--|--|--|--|--|--|--|--|--|--|--|--|--|--|--|--|--|--|--|--|--|--|--|--|--|--|--|--|--|--|--|--|--|--|--|--|--|--|--|--|--|--|--|--|--|--|--|--|--|--|--|--|--|--|--|--|--|--|--|--|--|--|--|--|--|--|--|--|--|--|--|--|--|--|--|--|--|--|--|--|--|--|--|--|--|--|--|--|--|--|--|--|--|--|--|--|--|--|--|--|--|--|--|--|--|--|--|--|--|--|--|--|--|--|--|--|--|--|--|--|--|--|--|--|--|--|--|--|--|--|--|--|--|--|--|--|--|--|--|--|--|--|--|--|--|--|--|--|--|--|--|--|--|--|--|--|--|--|--|--|--|--|--|--|--|--|--|--|--|--|--|--|--|--|--|--|--|--|--|--|--|--|--|--|--|--|--|--|--|--|--|--|--|--|--|--|--|--|--|--|--|--|--|--|--|--|--|--|--|--|--|--|--|--|--|--|--|--|--|--|--|--|--|--|--|--|--|--|--|--|--|--|--|--|--|--|--|--|--|--|--|--|--|--|--|--|--|--|--|--|--|--|--|--|--|--|--|--|--|--|--|--|--|--|--|--|--|--|--|--|--|--|--|--|--|--|--|--|--|--|--|--|--|--|--|--|--|--|--|--|--|--|--|--|--|--|--|--|--|--|--|--|--|--|--|--|--|--|--|--|--|--|--|--|--|--|--|--|--|--|--|--|--|--|--|--|--|--|--|--|--|--|--|--|--|--|--|--|--|--|--|--|--|--|--|--|--|--|--|--|--|--|--|--|--|--|--|--|--|--|--|--|--|--|--|--|--|--|--|--|--|--|--|--|--|--|--|--|--|--|--|--|--|--|--|--|--|--|--|--|--|--|--|--|--|--|--|--|--|--|--|--|--|--|--|--|--|--|--|--|--|--|--|--|--|--|--|--|--|--|--|--|--|--|--|--|--|--|--|--|--|--|--|--|--|--|--|--|--|--|--|--|--|--|--|--|--|--|--|--|--|--|--|--|--|--|--|--|--|--|--|--|--|--|--|--|--|--|--|--|--|--|--|--|--|--|--|--|--|--|--|--|--|--|--|--|--|--|--|--|--|--|--|--|--|--|--|--|--|--|--|--|--|--|--|--|--|--|--|--|--|--|--|--|--|--|--|--|--|--|--|--|--|--|--|--|--|--|--|--|--|--|--|--|--|--|--|--|--|--|--|--|--|--|--|--|--|--|--|--|--|--|--|--|--|--|--|--|--|--|--|--|--|--|--|--|--|--|--|--|--|--|--|--|--|--|--|--|--|--|--|--|--|--|--|--|--|--|--|--|--|--|--|--|--|--|--|--|--|--|--|--|--|--|--|--|--|--|--|--|--|--|--|--|--|--|--|--|--|--|--|--|--|--|--|--|--|--|--|--|--|--|--|--|--|--|--|--|--|--|--|--|--|--|--|--|--|--|--|--|--|--|--|--|--|--|--|--|--|--|--|--|--|--|--|--|--|--|--|--|--|--|--|--|--|--|--|--|--|--|--|--|--|--|--|--|--|--|--|--|--|--|--|--|--|--|--|--|--|--|--|--|--|--|--|--|--|--|--|--|--|--|--|--|--|--|--|--|--|--|--|--|--|--|--|--|--|--|--|--|--|--|--|--|--|--|--|--|--|--|--|--|--|--|--|--|--|--|--|--|--|--|--|--|--|--|--|--|--|--|--|--|--|--|--|--|--|--|--|--|--|--|--|--|--|--|--|--|--|--|--|--|--|--|--|--|--|--|--|--|--|--|--|--|--|--|--|--|--|--|--|--|--|--|--|--|--|--|--|--|--|--|--|--|--|--|--|--|--|--|--|--|--|--|--|--|--|--|--|--|--|--|--|--|--|--|--|--|--|--|--|--|--|--|--|--|--|--|--|--|--|--|--|--|--|--|--|--|--|--|--|--|--|--|--|--|--|--|--|--|--|--|--|--|--|--|--|--|--|--|--|--|--|--|--|--|--|--|--|--|--|--|--|--|--|--|--|--|--|--|--|--|--|--|--|--|--|--|--|--|--|--|--|--|--|--|--|--|--|--|--|--|--|--|--|--|--|--|--|--|--|--|--|--|--|--|--|--|--|--|--|--|--|--|--|--|--|--|--|--|--|--|--|--|--|--|--|--|--|--|--|--|--|--|--|--|--|--|--|--|--|--|--|--|--|--|--|--|--|--|--|--|--|--|--|--|--|--|--|--|--|--|--|--|--|--|--|--|--|--|--|--|--|--|--|--|--|--|--|--|--|--|--|--|--|--|--|--|--|--|--|--|--|--|--|--|--|--|--|--|--|--|--|--|--|--|--|--|--|--|--|--|--|--|--|--|--|--|--|--|--|--|--|--|--|--|--|--|--|--|--|--|--|--|--|--|--|--|--|--|--|--|--|--|--|--|--|--|--|--|--|--|--|--|--|--|--|--|--|--|--|--|--|--|--|--|--|--|--|--|--|--|--|--|--|--|--|--|--|--|--|--|--|--|--|--|--|--|--|--|--|--|--|--|--|--|--|--|--|--|--|--|--|--|--|--|--|--|--|--|--|--|--|--|--|--|--|--|--|--|--|--|--|--|--|--|--|--|--|--|--|--|--|--|--|--|--|--|--|--|--|--|--|--|--|--|--|--|--|--|--|--|--|--|--|--|--|--|--|--|--|--|--|--|--|--|--|--|--|--|--|--|--|--|--|--|--|--|--|--|--|--|--|--|--|--|--|--|--|--|--|--|--|--|--|--|--|--|--|--|--|--|--|--|--|--|--|--|--|--|--|--|--|--|--|--|--|--|--|--|--|--|--|--|--|--|--|--|--|--|--|--|--|--|--|--|--|--|--|--|--|--|--|--|--|--|--|--|--|--|--|--|--|--|--|--|--|--|--|--|--|--|--|--|--|--|--|--|--|--|--|--|--|--|--|--|--|--|--|--|--|--|--|--|--|--|--|--|--|--|--|--|--|--|--|--|--|--|--|--|--|--|--|--|--|--|--|--|--|--|--|--|--|--|--|--|--|--|--|--|--|--|--|--|--|--|--|--|--|--|--|--|--|--|--|--|--|--|--|--|--|--|--|--|--|--|--|--|--|--|--|--|--|--|--|--|--|--|--|--|--|--|--|--|--|--|--|--|--|--|--|--|--|--|--|--|----|

<sup>26</sup> model with BFP coverage, FHP coverage and the other municipality variables

<sup>27</sup> model with BFP coverage and the other municipality variables

<sup>28</sup> model with FHP coverage and the other municipality variables



[illegible][illegible]

|      |                      |                                       |           |    |              |                                                                                                                    |    |     |          |    |       |   |                                                  |                                                                                 |                             |   |  |    |    |    |    |    |    |    |                                                                     |                                                                     |
|------|----------------------|---------------------------------------|-----------|----|--------------|--------------------------------------------------------------------------------------------------------------------|----|-----|----------|----|-------|---|--------------------------------------------------|---------------------------------------------------------------------------------|-----------------------------|---|--|----|----|----|----|----|----|----|---------------------------------------------------------------------|---------------------------------------------------------------------|
| (51) | Nobre ML et al, 2015 | Brazil (State of Rio Grande do Norte) | 2001-2013 | EC | Municipality | Study to assess the risk of leprosy associated with socio-economic factors and the presence in the municipality of | PB | 167 | All ages | MX | 3,927 | I | Approximate average yearly incidence 9 / 100,000 | Presence of a train station in the municipality (Y/N); illiteracy rate (a), per | Presence of railway station | Y |  | NA | NA | NA | NA | NA | LR | OR | 1.00<br>6.00 (2.55,13.98)<br>1.04 (0.97, 1.11)<br>0.99 (0.99, 1.00) | 1.00<br>7.92 (2.93,21.41)<br>1.10 (0.98, 1.24)<br>0.99 (0.98, 1.01) |
|------|----------------------|---------------------------------------|-----------|----|--------------|--------------------------------------------------------------------------------------------------------------------|----|-----|----------|----|-------|---|--------------------------------------------------|---------------------------------------------------------------------------------|-----------------------------|---|--|----|----|----|----|----|----|----|---------------------------------------------------------------------|---------------------------------------------------------------------|



|                                                                                                                                                                                         |                         |                              |      |    |            |                                                                                                                                                                                         |    |     |          |    |    |   |                                                          |   |                                                                                                                                                                                          |                                                             |                                                                     |                                     |                |                                        |                                        |                |                             |                                                                                                               |                                                                                                                                                                                         |                                                                     |
|-----------------------------------------------------------------------------------------------------------------------------------------------------------------------------------------|-------------------------|------------------------------|------|----|------------|-----------------------------------------------------------------------------------------------------------------------------------------------------------------------------------------|----|-----|----------|----|----|---|----------------------------------------------------------|---|------------------------------------------------------------------------------------------------------------------------------------------------------------------------------------------|-------------------------------------------------------------|---------------------------------------------------------------------|-------------------------------------|----------------|----------------------------------------|----------------------------------------|----------------|-----------------------------|---------------------------------------------------------------------------------------------------------------|-----------------------------------------------------------------------------------------------------------------------------------------------------------------------------------------|---------------------------------------------------------------------|
|                                                                                                                                                                                         |                         |                              |      |    |            | blocks: 1.demographic factors, 2.socioeconomic factors, 3.health factors, and 4.diet-related factors.                                                                                   |    |     |          |    |    |   |                                                          |   | Score (DDS) and household food stocks;                                                                                                                                                   | Food expenditure (log) <sup>31</sup>                        | Per capita mean                                                     | 2.98                                | (0.17)         |                                        | 3.08                                   | (0.18)         |                             |                                                                                                               | 0.02* (0.00, 0.22)                                                                                                                                                                      | 0.03* (0.00, 0.36)<br>A. 0.02 (0.00, 0.45)<br>B. 0.005 (0.00, 0.08) |
|                                                                                                                                                                                         |                         |                              |      |    |            |                                                                                                                                                                                         |    |     |          |    |    |   |                                                          |   | A. multivariate analysis including all significant variables in analyses by block: age, sex, religion, household size, food expenditure, occupation, BMI, DDS and household food stocks; | Land ownership <sup>31</sup>                                | Landless<br>Land leaser<br>Landowner                                | 41<br>3<br>8                        |                |                                        | 58<br>8<br>34                          |                |                             | 1.00<br>0.49 (0.12, 1.99)<br>0.34* (0.14, 0.81)                                                               |                                                                                                                                                                                         |                                                                     |
|                                                                                                                                                                                         |                         |                              |      |    |            |                                                                                                                                                                                         |    |     |          |    |    |   |                                                          |   | Land size                                                                                                                                                                                | Self-classification <sup>31</sup>                           | mean size (m²)<br>Very poor<br>Poor<br>Low/middle<br>Middle<br>Rich | 387<br>17<br>21<br>11<br>3<br>0     | (1,214)        |                                        | 3,161<br>14<br>29<br>35<br>22<br>0     | (6,820)        |                             | 1.00<br>0.61* (0.24, 1.50)<br>0.26* (0.10, 0.69)<br>0.11* (0.03, 0.47)<br>-                                   |                                                                                                                                                                                         |                                                                     |
|                                                                                                                                                                                         |                         |                              |      |    |            |                                                                                                                                                                                         |    |     |          |    |    |   |                                                          |   | Occupation of the income generator <sup>31</sup>                                                                                                                                         |                                                             | Laborer<br>Shopkeeper<br><br>Other<br><br>Farmer<br><br>Business    | 26<br>10<br><br>8<br><br>5<br><br>3 |                |                                        | 28<br>13<br><br>25<br><br>19<br><br>15 |                |                             | 1.00<br>0.84* (0.31, 2.27)<br>0.32* (0.12, 0.86)<br><br>0.28* (0.09, 0.86)<br><br>0.19* (0.05, 0.76)          | 1.00<br>1.28 (0.44, 3.80)<br>A. 2.08 (0.62, 6.98)<br>0.44 (0.16, 1.22)<br>A. 0.59 (0.20, 1.72)<br>0.24 (0.07, 0.83)<br>A. 0.47 (0.12, 1.89)<br>0.31 (0.07,1.34)<br>A. 0.66 (0.13, 3.25) |                                                                     |
|                                                                                                                                                                                         |                         |                              |      |    |            |                                                                                                                                                                                         |    |     |          |    |    |   |                                                          |   | HFIAS <sup>32</sup> (score 0-27) <sup>33</sup>                                                                                                                                           | DDS (score 0-9) <sup>33</sup>                               | No                                                                  | 10.2<br>3.2                         | (7.4)<br>(1.1) |                                        | 6.4<br>3.8                             | (7.0)<br>(1.4) |                             | 1.08* (1.03, 1.13)<br>0.67* (0.50, 0.89)                                                                      | 0.71* (0.52, 0.96)<br>A. 0.83 (0.58, 1.18)                                                                                                                                              |                                                                     |
|                                                                                                                                                                                         |                         |                              |      |    |            |                                                                                                                                                                                         |    |     |          |    |    |   |                                                          |   | Recent food shortage (past year) <sup>33</sup>                                                                                                                                           | Yes<br>No                                                   | 10<br>42                                                            |                                     |                | 36<br>64                               |                                        |                | 1.00<br>2.42* (1.07, 5.47)  |                                                                                                               |                                                                                                                                                                                         |                                                                     |
|                                                                                                                                                                                         |                         |                              |      |    |            |                                                                                                                                                                                         |    |     |          |    |    |   |                                                          |   | Ever food shortage <sup>33</sup>                                                                                                                                                         | Yes<br>No                                                   | 2<br>50                                                             |                                     |                | 16<br>84                               |                                        |                | 1.00<br>4.30* (0.93, 19.77) |                                                                                                               |                                                                                                                                                                                         |                                                                     |
|                                                                                                                                                                                         |                         |                              |      |    |            |                                                                                                                                                                                         |    |     |          |    |    |   |                                                          |   | Household food stocks <sup>33</sup>                                                                                                                                                      | Yes                                                         | 25<br>27                                                            |                                     |                | 26<br>74                               |                                        |                | 1.00<br>0.38* (0.19, 0.78)  | 1.00<br>0.45* (0.22, 0.95)<br>A. 0.66 (0.29, 1.50)                                                            |                                                                                                                                                                                         |                                                                     |
| DDS and household food stocks were the most important diet-related factors negatively associated with leprosy. Food expenditure per capita was also negatively associated with leprosy. |                         |                              |      |    |            |                                                                                                                                                                                         |    |     |          |    |    |   |                                                          |   |                                                                                                                                                                                          |                                                             |                                                                     |                                     |                |                                        |                                        |                |                             |                                                                                                               |                                                                                                                                                                                         |                                                                     |
| (52)                                                                                                                                                                                    | Castro SS et al, 2016   | Brazil                       | 2010 | EC | State      | The study analyzed the 27 Brazilian States, to estimate the incidence of leprosy and assess the correlation between overall incidence and social and demographic variables from Census. | PB | 27  | All ages | MX | NA | I | 22.2/100,000                                             | N | Mean residents per household<br>Water supply<br>Presence of bathroom in the house<br>Sex                                                                                                 |                                                             |                                                                     |                                     |                |                                        |                                        |                | Pearson correlation         | R²/p-value                                                                                                    | 0.46*(p=0.0148)<br><br>-0.69*(p<0.001)<br>-0.52*(p=0.0052)                                                                                                                              |                                                                     |
| Leprosy incidence is positively associated with higher household density, and negatively associated with presence of water supply and of bathroom in the house.                         |                         |                              |      |    |            |                                                                                                                                                                                         |    |     |          |    |    |   |                                                          |   |                                                                                                                                                                                          |                                                             |                                                                     |                                     |                |                                        |                                        |                |                             |                                                                                                               |                                                                                                                                                                                         |                                                                     |
| (40)                                                                                                                                                                                    | Dabrera TME et al, 2016 | Sri Lanka (Puttlam district) | 2012 | CS | Individual | Comprehensive household survey in the all of 166 households from a small village.                                                                                                       | PB | 753 | All ages | NA | 39 | P | 511/10,000 (overall);<br>183.24/10,000 (in <15 year-old) | N | Sex<br><br>Age (dummy)                                                                                                                                                                   | Female<br>Male<br>0 to 5<br>6 to 15<br>16 to 30<br>31 to 45 | 25<br>14<br>3<br>11<br>14<br>6                                      |                                     |                | 396<br>438<br>109<br>185<br>165<br>133 |                                        | LR             | OR                          | 1.43 (0.73, 2.80)<br>1.00<br>0.46 (0.14, 1.50)<br>1.12 (0.54, 2.20)<br>1.86 (0.94, 3.66)<br>0.79 (0.32, 1.93) |                                                                                                                                                                                         |                                                                     |

<sup>32</sup> Household Food Insecurity Access Scale  
<sup>33</sup> included in the 4<sup>th</sup> block (diet-related factors)
